1       **A key role for UV sex chromosomes in the regulation of parthenogenesis in the brown alga**  
2       ***Ectocarpus***

3       Laure Mignerot<sup>1</sup>, Komlan Avia<sup>1</sup>, Remy Luthringer<sup>1</sup>, Agnieszka P. Lipinska<sup>1</sup>, Akira F. Peters<sup>2</sup>, J. Mark  
4       Cock<sup>1</sup>, Susana M. Coelho<sup>1\*</sup>

5       <sup>1</sup>Sorbonne Université, UPMC Univ Paris 06, CNRS, Algal Genetics Group, UMR 8227, Integrative  
6       Biology of Marine Models, Station Biologique de Roscoff, CS 90074, F-29688, Roscoff, France.

7       <sup>2</sup>Bezhin Rosko, 29250 Santec, France.

8       \*Correspondence: [coelho@sb-roscoff.fr](mailto:coelho@sb-roscoff.fr)

9       **ABSTRACT**

10       Although evolutionary transitions from sexual to asexual reproduction are frequent in  
11       eukaryotes, the genetic bases of these shifts remain largely elusive. Here, we used classic  
12       quantitative trait analysis, combined with genomic and transcriptomic information to dissect the  
13       genetic basis of asexual, parthenogenetic reproduction in the brown alga *Ectocarpus*. We found  
14       that parthenogenesis is controlled by the sex locus, together with two additional autosomal loci,  
15       highlight the key role of the sex chromosome as a major regulator of asexual reproduction.  
16       Importantly, we identify several negative effects of parthenogenesis on male fitness, but also  
17       different fitness effects between parthenogenesis and life cycle generations, supporting the idea  
18       that parthenogenesis may be under both sexual selection and generation/ploidally-antagonistic  
19       selection. Overall, our data provide the first empirical illustration, to our knowledge, of a trade-  
20       off between the haploid and diploid stages of the life cycle, where distinct parthenogenesis alleles  
21       have opposing effects on sexual and asexual reproduction and may contribute to the maintenance  
22       of genetic variation. These types of fitness trade-offs have profound evolutionary implications in  
23       natural populations and may structure life history evolution in organisms with haploid-diploid life  
24       cycles.

25       **INTRODUCTION**

26       Although sexual reproduction, involving fusion of two gametes, is almost ubiquitous across  
27       eukaryotes, transitions to asexual reproduction have arisen remarkably frequently [1].  
28       Parthenogenesis, which is widespread in all major eukaryotic lineages [2–7], involves the  
29       development of an embryo from an unfertilized gamete, without contribution from males [1]. In

30 plants, parthenogenesis is a component of apomixis, which is the asexual formation of seeds,  
31 resulting in progeny that are genetically identical to the mother plant. In gametophytic apomixis,  
32 the embryo sac develops either from a megaspore mother cell without a reduction in ploidy  
33 (diplospory) or from a nearby nucellar cell (apospory) in a process termed apomeiosis. Apomeiosis  
34 is then followed by parthenogenesis, which leads to the development of the diploid egg cell into an  
35 embryo, in the absence of fertilization (reviewed in [8]).

36 The molecular mechanisms underlying parthenogenesis in plants and animals remain largely  
37 elusive, although the factors triggering the transition to asexual reproduction have been more  
38 intensively studied in plants than in animals, motivated by the potential use of asexual  
39 multiplication in the production of crop plants for agriculture (e.g.[9,10]). In some apomictic plants,  
40 inheritance of parthenogenesis is strictly linked to an apomeiosis locus (reviewed in [11]). In other  
41 species the parthenogenesis locus segregates independently of apomeiosis [12–14]. For example,  
42 apomixis in *Hieracium* is controlled by two loci termed *LOSS OF APOMEIOSIS (LOA)* and *LOSS OF*  
43 *PARTHENOGENESIS (LOP)*, involved respectively in apomeiosis and parthenogenesis, respectively  
44 [15]. A third locus (*AutE*) involved in autonomous endosperm formation, was shown to be tightly  
45 linked to the LOP locus [16]. In *Pennisetum squamulatum*, apomixis segregates as a single dominant  
46 locus, the apospory-specific genomic region (ASGR), and recent work has highlighted a role for  
47 PsASGR-BABY BOOM-like, a member of the BBM-like subgroup of APETALA 2 transcription factors  
48 residing in the ASGR, in controlling parthenogenesis [17].

49 Parthenogenesis is also a relevant reproductive process in the brown algae, a group of  
50 multicellular eukaryotes that has been evolving independently from animals and plants for more  
51 than a billion years [18]. Once released into the surrounding seawater, gametes of brown algae may  
52 fuse with a gamete of the opposite sex, to produce a zygote which will develop into a diploid  
53 heterozygous sporophyte. Alternatively, in some brown algae, gametes that do not find a partner  
54 will develop parthenogenically, as haploid (partheno-)sporophytes (e.g. [19]). Parthenogenesis in  
55 brown algae can therefore be equated with gametophytic embryogenesis in plants, where embryos  
56 are produced from gametes [20], but in the case of brown algae the parthenogenetic gamete is  
57 haploid. The brown algae are therefore excellent models to study the molecular basis of  
58 parthenogenesis because gametes are produced directly by mitosis from the multicellular haploid  
59 gametophyte, allowing parthenogenesis to be disentangled from apomeiosis. Although  
60 parthenogenesis has been described in several species of brown algae (e.g.[21–23]), the genetic  
61 basis, the underlying mechanisms and the evolutionary drivers and consequences of this process  
62 remain obscure.

63 The haploid-diploid life cycles of brown algae of the genus *Ectocarpus* involve alternation  
64 between a haploid gametophyte and a diploid sporophyte, both of which consist of branched  
65 multicellular filaments (Figure 1A). Superimposed on this sexual cycle, an asexual, parthenogenetic  
66 cycle has been described for some *Ectocarpus* strains [19,21]. In this parthenogenetic cycle,  
67 gametes that fail to meet a partner of the opposite sex develop into haploid partheno-sporophytes.  
68 These partheno-sporophytes are indistinguishable morphologically from diploid sporophytes [21].  
69 Partheno-sporophytes can produce gametophyte progeny to return to the sexual cycle through two  
70 mechanisms: 1) endoreduplication during development to produce diploid cells that can undergo  
71 meiosis or 2) individuals that remain haploid can initiate apomeiosis [21].

72 Here, we used a quantitative trait loci (QTL) approach to investigate the genetic basis of  
73 parthenogenesis in the brown alga *Ectocarpus siliculosus*. We show that parthenogenesis is a  
74 complex genetic trait under the control of three QTLs, one major QTL located on the sex  
75 chromosome, another on chromosome 18, with one additional minor QTL also on chromosome 18.  
76 We used genomic and transcriptomic analysis to establish a list of 89 candidate genes within the  
77 QTL intervals. Importantly, our work detected significant sex by genotype interactions for the  
78 parthenogenetic capacity, highlighting the critical role of the sex chromosome in the control of  
79 asexual reproduction. Moreover, we identify several negative effects of parthenogenesis on male  
80 fitness and we reveal strong evidence for trade-offs between sexual and asexual reproduction  
81 during the life cycle of *Ectocarpus*. Overall, our results support the idea that parthenogenesis is a  
82 trait under sexual selection and ploidy-antagonistic selection in *Ectocarpus*.

## 83 RESULTS

### 84 Parthenogenesis is controlled genetically

85 To precisely quantify the parthenogenetic capacity of two strains of *E. siliculosus*, clonal cultures  
86 of male (RB1) and female (EA1) *E. siliculosus* gametophytes, collected from a field population in  
87 Naples, were induced to release gametes under strong light (see methods) and pools of male and  
88 female gametes were allowed to settle separately, without mixing of the two sexes, on coverslips.  
89 Development of the gametes was then followed for 16 days (Figure 1B, Table S1). After 5 days, both  
90 male and female gametes had started to germinate and went through the first cell divisions. After  
91 16 days, 94% of the female gametes had grown into >10 cell filaments, whereas 96% of the male  
92 gametes remained at the 3-4 cell stage and cell death was observed after about 20 days. Strains  
93 were therefore scored as parthenogenetic (P+) when more than 90% of the gametes have

94 developed beyond the 10-cell stage at 16-days post release and as non-parthenogenic (P-), when  
95 less than 4% of the gametes had developed at 16d after release (Figure 1B, Table S1).

96

97 In several brown algal species, unfused male and female gametes show different  
98 parthenogenetic capacity, and it is usually the female gametes that are capable of parthenogenesis  
99 whereas male gametes are non-parthenogenic (e.g. [23,24]). To investigate if there was a link  
100 between parthenogenetic capacity and sex, we crossed the female (EA1) P+ strain with the male  
101 (RB1) P- strain described above (Figure S1, Table S1). The diploid heterozygous zygote resulting  
102 from this cross (strain Ec236) was used to generate a segregating family of 272 haploid  
103 gametophytes. These 272 siblings were sexed using molecular markers [25] and their gametes  
104 phenotyped for parthenogenetic capacity (see above). The segregating population was composed  
105 of 144 females and 128 males, consistent with a 1:1 segregation pattern (chi2 test; p-value=0.33,  
106 Table S2). Phenotypic assessment of the parthenogenetic capacity of the gametes released by each  
107 gametophyte revealed a significant bias in the inheritance pattern, with 84 individuals presenting a  
108 P- phenotype and 188 a P+ phenotype (Chi2 test; p-value= $2.86 \times 10^{-10}$ ) (Table S2, S3). Strikingly, all  
109 female strains exhibited a P+ phenotype whereas 30% of the male strains were recombinants, i.e.  
110 had a P+ phenotype (Table S2). This result indicated the presence of a parthenogenesis locus or loci  
111 that was not fully linked to the sex locus, and suggested a complex relationship between gender  
112 and parthenogenetic capacity.

### 113 **Stability of the parthenogenetic phenotype**

114 A subset of the segregating family derived from the EA1 x RB1 cross was tested for phenotype  
115 stability. We cultivated two male P+ gametophytes, two male P- gametophytes and two female P+  
116 gametophytes under different environmental conditions, varying light levels and temperature.  
117 After two weeks in culture, fertility was induced, and the parthenogenetic capacity of the gametes  
118 was scored (Table S4). The parthenogenetic phenotype of all strains was stably maintained  
119 regardless the culture conditions.

120 We also tested the stability of the parthenogenetic phenotype across generations: gametes of  
121 each of the three types (male P+, male P- and female P+) were allowed to develop into partheno-  
122 sporophytes. Note that this experiment is possible with P- males because a small proportion of male  
123 P- gametes (less than 4%) does not exhibit growth arrest and is able to grow to maturity. After two  
124 weeks in culture, gamete-derived partheno-sporophytes produced unilocular sporangia and  
125 released spores that developed into gametophytes. This second generation of gametophytes was

126 again phenotyped for parthenogenetic capacity, and the results showed without exception that the  
127 parthenogenetic phenotype was stably maintained across generations (Table S4).

128 To further investigate the inheritance of parthenogenetic capacity, a male P+ individual was  
129 crossed with a P+ female (Figure S1). A total of 23 gametophyte lines were produced from two  
130 heterozygous sporophytes resulting from this cross. Phenotyping for sex and parthenogenesis  
131 revealed that all gametophyte lines exhibited a P+ phenotype, regardless of the sex (Table S5). We  
132 concluded that parthenogenesis is controlled by a genetic factor(s).

### 133 **Generation of a genetic map for *E. siliculosus***

134 To produce a genetic map based on the EA1 x RB1 cross, a ddRAD-seq library was generated  
135 using 152 lines of the segregating progeny (Figure S1) and sequenced on an Illumina HiSeq 2500  
136 platform. A total of 595 million raw reads were obtained, of which 508 million reads passed the  
137 quality filters with a Q30 of 74.1%. A catalogue of 8648 SNP loci was generated using filtered reads  
138 from the parental strains and the STACKS pipeline (version 1.44) [26]. Twenty-eight individuals were  
139 removed due to excessive missing genotypes (see Methods) and highly distorted markers were also  
140 removed. The final map constructed with 124 individuals contained 5594 markers distributed  
141 across 31 linkage groups (LGs) and spanning 2947.5 centimorgans (cM). The average spacing  
142 between two adjacent markers was 0.5 cM and the largest gap was 17.6 cM (on LG23). The lengths  
143 of the 31 LGs ranged from 174 cM with 397 markers to 13 cM with 31 markers (Figure 2A, Table  
144 S6).

145 Note that the Peruvian *Ectocarpus* strain that was used to generate the reference genome  
146 sequence [27] was originally taxonomically classified as *Ectocarpus siliculosus* but subsequent  
147 analysis has demonstrated that this strain actually belongs to a distinct species within the  
148 *Ectocarpus siliculosi* group [28]. The genetic map generated here using *bona fide Ectocarpus*  
149 *siliculosus* strains is therefore for a novel species relative to the genetic maps generated for the  
150 Peruvian strain [29,30].

### 151 **QTL mapping approach to identify loci involved in parthenogenesis**

152 To decipher the genetic architecture of parthenogenesis in *E. siliculosus*, we applied an “all-or-  
153 none” phenotyping and a quantitative trait loci (QTL) mapping approach, by considering P+ and P-  
154 as the two most ‘extreme’ phenotypes. We used the high-resolution genetic map to statistically  
155 associate markers with the P+ and P- phenotypes in the segregating family described above.

156 QTL mapping and association analysis identified three QTLs for parthenogenesis: two large-  
157 effect QTLs ( $r^2 > 15\%$ ) and one smaller-effect QTL ( $r^2=11.9\%$ ) (Figure 2A). Together, these three QTL

158 explained 44.8% of the phenotypic variance. The QTLs were located on two different LGs, LG2 and  
159 LG18 (Figure 2A). LG2 was identified as the sex chromosome (Figure 2) and one of the large effect  
160 QTLs ( $P1$ ) co-localized with the sex-determining region (SDR) of the sex chromosome. The  $P1$  locus  
161 was detected at the highest significance level ( $p$ -value  $<0.0001$ ) with the Kruskal-Wallis statistical  
162 test ( $K^*=20.392$ ). The other major effect locus, which we refer to as the  $P2$  locus, was located on  
163 LG18, and was also detected at the highest significance level with a Kruskal-Wallis statistical test ( $p$ -  
164 value  $<0.0001, K^*=19.993$ )(Table S7). A non-parametric interval mapping (IM) method also detected  
165 both  $P1$  and  $P2$  loci, and indicated a proportion of variance explained (PVE) of 16.6% for the  $P1$  and  
166 16.3% for the  $P2$  QTLs. The  $P1$  locus spanned 13.36 cM from 37.53 to 50.89 cM with a peak position  
167 at 47.66 cM whereas the  $P2$  locus spanned 2.82 cM, from 92.77 to 95.59 cM with a peak position  
168 at 93.98 cM.

169 The third QTL ( $P3$ ) was detected only with the Kruskal-Wallis statistical test ( $K^*=14.634$ ,  $p$ -  
170 value  $<0.0005$ ) and was also located on LG18. The  $P3$  QTL had a smaller effect than  $P1$  and  $P2$ , and  
171 explained 11.9% of the phenotypic variance (Figure 2A, 2B; Table S7).

172 Note that the QTL mapping described above was implemented using all 152 progeny (Figure S1),  
173 which included both male and female strains. To investigate the contribution of the sex-specific,  
174 non-recombining region of the sex chromosome, we performed the same analysis using a subset  
175 of 93 male strains. The result showed that when females were excluded, the  $P1$  and the  $P3$  QTLs  
176 were not detected, and only the QTL located on LG18 ( $P2$ ) was significantly detected (Table S7).  
177 The absence of detection of the  $P1$  QTL was not due to reduced statistical power due to the small  
178 sample size, because the QTL was detected when a sub-sample of 93 male and female individuals  
179 with the same sex ratio as the full 124 samples was used (Table S7). The minor  $P3$  QTL was at the  
180 limit of significance when the 93 sub-sampled individuals were used, suggesting that the reduced  
181 sample size prevented the detection of this minor QTL. Taken together, our results indicate that  
182 the  $P1$  QTL is linked to the SDR.

183 To more precisely locate the three QTL intervals detected using the whole dataset, the decay of  
184 pairwise linkage disequilibrium ( $r^2$ ) was estimated for each linkage group (Figure 2C). An  $r^2$   
185 threshold of 0.2 was used to determine approximate windows at the QTL positions to search for  
186 putative candidate genes. Based on these windows we determined the number of genes present  
187 in each QTL interval using both the reference genome of the closely related species *Ectocarpus*  
188 species 7 (strain Ec32) [18,31] and an assembly of the genome of the male parent (RB1; [32]) (Table  
189 S10). The two main QTL intervals contained between 96 and 98 genes (depending on whether the  
190 female U or male V chromosome, which have slightly different gene numbers in the SDR, is

191 considered, respectively). In total, 201/203 genes were located in the intervals corresponding to  
192 the three parthenogenesis QTLs (Figure 2D, Table S7).

193 Gene Ontology enrichment tools were used to test if some functional categories were over-  
194 represented in QTL regions. BLAST2GO analysis showed that the genes in the QTL intervals were  
195 significantly enriched in processes related to signalling and cell communication ( $p$ -value < 0.0001)  
196 (Figure S2, Table S8).

### 197 **Epistasis analysis**

198 An epistasis analysis was carried out to detect potential interactions between the  
199 parthenogenesis QTLs. Two analyses were performed, using either all 152 male and female progeny  
200 ('full dataset') or the subset of all the 93 male individuals.

201 We observed significant sex by genotype interactions for parthenogenetic capacity. The analysis  
202 of the full dataset identified an epistatic interaction between the *P2* QTL and the *P1* QTL (Figure 3).  
203 When the same analysis was carried out with only the males, this epistatic interaction was not  
204 detected (Table S9). This result indicated that the epistasis was driven by the female-specific region.  
205 In Figure 3, the B allele was inherited from the female parent, and the A allele from the male parent.  
206 All females were parthenogenetic (B allele on the *P1* locus in Figure 3) and therefore their  
207 parthenogenetic phenotype was independent of the allele carried at the *P2* locus. In contrast, the  
208 phenotype of males depended on the allele carried at the *P2* locus.

209 An additional interaction was detected between the *P2* QTL and the *P3* QTL. In this case, the  
210 frequency of P+ individuals was higher when the maternal B allele was present at the *P2* locus and  
211 the effect was strongest when the *P3* locus carried the maternal B allele (Figure 3B).

212 Several additional interactions were detected between the *P2* QTL and markers on several  
213 autosomes when the male-only dataset was analysed (Table S9).

### 214 **Identification of candidate genes within the parthenogenesis QTL intervals**

215 We used several approaches to identify candidate parthenogenesis genes within the three QTL  
216 intervals. First, we reasoned that genes involved in parthenogenesis should be expressed at least  
217 in one of the gamete types, P+ or P-, where parthenogenesis is initiated. Strains EA1 and RB1 did  
218 not produce enough gametes for RNA extraction. We therefore generated RNA-seq data from P+  
219 female and P- male strains from another species within the *E. siliculosi* group, *Ectocarpus* species 1  
220 [31] (see methods). We analysed the abundance of the transcripts of orthologs of the 201-203  
221 genes within the three QTL intervals. Based on this analysis, 133/139 genes (depending on whether

222 we consider the U or the V, respectively) were classed as being expressed in at least one of the  
223 gamete types (Table S11).

224 Second, we looked for genes that were significantly differentially expressed between P+ and P-  
225 gametes, again using the data for *Ectocarpus* species 1 orthologues. Overall, 4902 orthologues were  
226 differentially expressed in P+ versus P- strains across the genome, of which 64 corresponded to  
227 genes located within the QTL intervals (Figure 2D, Table S10). The QTL intervals were therefore  
228 significantly enriched in genes that we classed as being differentially expressed between P+ and P-  
229 strains (Fisher exact test; p-value=0.0165).

230 Third, we looked for polymorphisms with potential effects on the functions of the candidate  
231 genes. Comparison of the parental genomic sequences identified 10961 indels and 32682 SNPs  
232 within the three QTL intervals (Table S11, S12). In total, 67 genes within the QTL intervals carried  
233 SNPs or indels that corresponded to non-synonymous modifications of the coding sequence and  
234 were therefore predicted to affect protein function. The male and female SDRs do not recombine  
235 [33] and have therefore diverged considerably over evolutionary time. This has included loss and  
236 gain of genes but also strong divergence of the genes that have been retained in both regions  
237 (gametologs). All SDR genes were therefore retained as candidates (Table S11).

238 We then combined the three approaches. The criteria we used were that genes involved in  
239 parthenogenesis must be expressed in gametes and they should have either differential expression  
240 in P+ versus P- gametes or carry a non-synonymous polymorphism. This reduced the number of  
241 candidates to 17/22 (U/V chromosome) genes in the *P1*, 11 genes in the *P2* and 56 genes in the *P3*  
242 QTL (Figure 2D, Table S11). Taking genes that were both differentially expressed in P+ versus P-  
243 gametes and that carried a non-synonymous polymorphism (Table S11, Figure 2D) further reduced  
244 the list of candidate genes to 9/14 (U/V), 1 and 16 candidates (in *P1*, *P2* and *P3* respectively).

#### 245 **Parthenogenetic male gametes exhibit reduced fitness in sexual crosses**

246 It is not clear why some strains of *Ectocarpus* exhibit male gamete parthenogenesis whilst others  
247 do not. More specifically, bearing in mind that all strains tested so far exhibit parthenogenesis of  
248 female gametes, why are male gametes not parthenogenetic in some lineages? To address this  
249 question, we investigated if there were differences in fitness between P- and P+ male gametes for  
250 parameters other than parthenogenetic growth. Specifically, we examined fertilisation success  
251 (capacity to fuse with a female gamete) and growth of the resulting diploid sporophyte.

252 We tested several combinations of crosses between P- or P+ males and several females (Table  
253 S13). Overall, male P- gametes tended to fuse more efficiently with female gametes compared to  
254 P+ male gametes, even if the difference was not significant (Figure 4A, Student's t-test p=0.059).



255 Importantly, embryos arising from a P- male gamete grew significantly faster than embryos derived  
256 from fusion with a male P+ gamete (Figure 4B, 4C, Mann-Whitney u-test  $p < 0.05$ ).

257 The overall size of zygotes is expected to be correlated with zygotic and diploid fitness [34–36].  
258 We therefore hypothesised that if P- male gametes are larger, fusion with a female gamete would  
259 generate larger (and therefore fitter) zygotes. Measurements of gamete size of P+ and P- strains  
260 revealed significant differences in gamete size between different strains (Kruskal-Wallis test,  
261  $\chi^2 = 3452.395$ ,  $P < 2.2 \times 10^{-16}$ , Table S14, Figure 4D, Figure S2). However, there was no correlation  
262 between the parthenogenetic capacity of male gametes and their size, suggesting that the  
263 increased fitness of the zygotes was unlikely to be related to the size of the male gametes.

264 Taken together, these analyses indicate that P+ male gametes exhibit overall reduced fitness in  
265 sexual crosses, both at the level of success of fusion with a female gamete and growth of the  
266 resulting embryo. We found no link between the size of the male gamete and the capacity to  
267 perform parthenogenesis, which excludes the possibility that the fitness decrease is due to the size  
268 of the male gamete.

## 269 DISCUSSION

### 270 A key role for the sex chromosome in parthenogenesis

271 In this study, we uncover the genetic architecture of parthenogenesis in the brown alga *E.*  
272 *siliculosus* and demonstrate that this trait is controlled by two major and one minor QTL loci that,  
273 together, account for 44.8% of the phenotypic variation. The two main QTL loci were located in the  
274 SDR on the sex chromosome and on LG18 respectively, and the minor QTL was also located in LG18.  
275 Analysis of differential expression pattern and polymorphism for genes within the QTL intervals  
276 allowed the establishment of a list of a total of 89 candidate parthenogenesis genes: 17/22 genes  
277 within the sex chromosome QTL interval (in the U and V respectively), 11 genes within the *P2* locus  
278 and 56 within the interval of the minor *P3* locus. Interestingly, within the major *P2* QTL a strong  
279 candidate gene coded for a membrane-localized ankyrin repeat-domain palmitoyltransferase (Ec-  
280 20\_004890). In *S. cerevisiae*, genes belonging to the same family are involved in the gamete  
281 pheromone response pathway, regulating the switching between vegetative and mating states  
282 [37,38].

283 Our results reveal a critical role for the sex chromosome in the control of parthenogenesis, with  
284 a major effect QTL being located within (or very tightly linked to) the SDR. Interactions between the  
285 SDR and the major *P2* QTL locus were detected only when the female SDR was present and

286 parthenogenesis was triggered in females regardless of the allele carried at the *P2* or *P3* locus. The  
287 observed effects could be due to a conditional repressor of parthenogenesis in the male V-specific  
288 region or an activator of parthenogenesis in the female U-specific region. However, a recent paper  
289 on another brown alga *Undaria pinnatifida* described genetically male individuals that were capable  
290 of producing oogonia and whose eggs were parthenogenic [39]. Similarly, several male *L. pallida*  
291 lines from a South African population had unusual reproductive structures resembling small eggs,  
292 which are also capable of parthenogenesis (Ingo Maier, pers. commun.). These results would  
293 therefore be consistent with a repressor of parthenogenesis being present on the V-specific region  
294 in these brown algae, that appears to be impaired in variant strains, or with an activator of  
295 parthenogenesis downstream of the female cascade.

### 296 **Male fitness effects of parthenogenetic capacity**

297 Our results indicate that parthenogenetic capacity has a dramatic impact on the fitness of male  
298 gametes. Specifically, P- male gametes are fitter than P+ male gametes for sexual reproduction and  
299 this is reflected in significantly higher fertilisation success and higher growth rate of the resulting  
300 zygote. Considering that P+ males would be expected to exhibit reduced fitness in sexually  
301 reproducing populations, and the fact that females are phenotypically P+ regardless of the allele at  
302 the *P2* and *P3* QTL, how can the P+ allele be preserved in the population? In other words, how is  
303 the parthenogenesis polymorphism maintained?

304 Heterozygous advantage can maintain polymorphism in diploid organisms. For instance, most  
305 obligate parthenogenetic vertebrates arise from hybridization between closely related species,  
306 resulting in elevated individual heterozygosity relative to the parental genotypes [40–42]. This is  
307 considered adaptive for colonizing new areas where high genetic diversity may provide the  
308 necessary genetic tools to adjust to new conditions. In the case of *Ectocarpus*, fixing the P+ allele in  
309 the female SDR and the P- allele in the male SDR would be a way to maintain the alleles polymorphic  
310 in the sporophyte. Note however that this process would be applicable to the SDR QTL, and would  
311 not necessarily explain the polymorphism maintained at the autosomal QTLs.

312 One interesting possibility is that parthenogenesis is a sexually antagonistic trait (or at least  
313 differentially selected in males versus females), i.e., P+ alleles would be advantageous for females  
314 because they would be capable of reproducing even in absence of gametes of the opposite sex, so  
315 that P+ would be selected for in females, whereas P- increases male fitness because sporophytes  
316 sired by a P- male can grow more rapidly. Polymorphism could therefore be maintained by  
317 balancing selection [43–45]). Although we could not measure the effect of parthenogenetic  
318 capacity on female gamete fitness, because all females were phenotypically P+, sexual antagonism

319 would be consistent with the pervasiveness of the female P+ phenotype and the differences in  
320 fitness between P+ and P- males. This phenomenon would be particularly relevant in spatially  
321 heterogeneous and/or unpredictable environments, where the P+ or P- allele(s) in males would  
322 alternatively selected for, depending on female density. In this scenario, parthenogenesis capacity  
323 could be considered a bet-hedging strategy for males.

324 Temporal or spatial changes in population density are extremely common (e.g.[56–58]), and this  
325 will probably cause strong fluctuating selection on sex-specific traits [59,60], contributing to  
326 maintaining genetic polymorphism in populations [46]. A polymorphism can be maintained by  
327 fluctuating selection when selection varies in both space and time [47] or when some genotypes  
328 are shielded from selection as in a seed bank [48–50]. This effect of sex limitation on the stability  
329 of a polymorphism is caused by a storage effect that automatically occurs when traits are expressed  
330 in only one sex. In the other sex, these alleles are sheltered from selection, because they are not  
331 expressed [50]. In the specific case of *E. siliculosus*, the P- allele would be shielded from selection  
332 because it is never expressed in females. In other words, if expression of P- allele(s) is limited to  
333 males, fluctuating selection of this sex-limited trait could therefore lead to the existence of a  
334 protected polymorphism, and contribute to explain the maintenance of genetic variance at the  
335 autosomal QTLs. The P+ allele would be maintained because it is advantageous in males when  
336 females are rare or when populations have low density.

337 Another potential mechanism for the maintenance of genetic variation is opposing selection  
338 during the diploid and haploid stages of biphasic life cycles, also known as ploidy-antagonistic  
339 selection [51]. Parthenogenesis could be considered an example of a trait under  
340 ploidy/generation antagonistic selection because the P- allele transmitted by the male gamete is  
341 advantageous to the diploid (sporophyte) generation (because zygotes grow faster if the father is  
342 a P-) but detrimental to the haploid (partheno-sporophyte) generation (because if they do not find  
343 a female gamete, males that carry a P- allele die). Ploidy-antagonistic selection has been  
344 proposed to have a significant impact on major evolutionary dynamics, including the maintenance  
345 of genetic variation ([51–53] and the rate of adaptation [54]. Moreover, it appears that P+ and P-  
346 are under differential selective pressures in males (when populations reproduce sexually, P- should  
347 be beneficial to males and P+ detrimental). Mathematical modelling [55] predicts that when  
348 selection differs between the sexes (and in particular when the gametophyte-deleterious allele is  
349 neutral or slightly beneficial in one of the sexes), being close or within the SDR expands the range  
350 of parameters allowing generation-antagonistic mutations to spread. Note that conflict arising from  
351 generation-antagonism or from differences in selection in gametophytes versus sporophyte  
352 generation is best resolved by complete linkage to the SDR [55].

### 353 **Is parthenogenesis adaptive?**

354 In the brown algae, the ancestral state appears to have been sexual reproduction through  
355 fusion of strongly dimorphic gametes (oogamy) [56], that were incapable of parthenogenesis  
356 (reviewed in [24]). This suggests that gamete parthenogenesis was superimposed on a sexual cycle,  
357 having evolved secondarily possibly to ensure reproduction in conditions where populations have,  
358 for instance, low population density. A challenge for understanding the adaptive nature of gamete  
359 parthenogenesis in these organisms would be to identify the conditions under which it occurs in  
360 nature. Brown algae exhibit a remarkable degree of reproductive plasticity during their life cycle  
361 [21,57] and it is possible that this plasticity is related to capacity to adapt to new conditions, in  
362 particular low population density or very fragmented habitats where finding a partner may be  
363 problematic. It has been predicted that in marginal populations, or other situations where mates  
364 are limited, parthenogenesis could be adaptive and thus selectively favored [58]. In animals (fish,  
365 *Drosophila*) rapid transition between reproductive strategies were observed following the removal  
366 of the mate, supporting the hypothesis that parthenogenesis has a reproductive advantage under  
367 conditions of isolation from potential mates [59]. A recent study of *Ectocarpus siliculosus*  
368 populations in NW of France has shown that asexual populations are prevalent in the field, but  
369 gamete parthenogenesis does not appear to play a critical role in this population, and instead,  
370 asexual sporophytes are produced mainly from the development of diploid, asexual spores [60].  
371 Additional population data are required, specifically for natural populations where individuals are  
372 found at different densities, for marginal versus central populations and for different types of  
373 habitat, to further investigate whether there is an adaptive benefit to parthenogenesis.

## 374 **MATERIAL AND METHODS**

### 375 ***E. siliculosus* cultures**

376 Gametophytes of *E. siliculosus* (Table S1) were maintained in culture as previously described  
377 [61]. *E. siliculosus* strains can be maintained in the gametophyte generation indefinitely, with  
378 weekly changes in culture media [61]. Clonal cultures of male and female gametophytes were  
379 subjected to strong light ( $100 \mu\text{m photons/m}^2/\text{s}$ ) and low temperatures ( $10^\circ\text{C}$ ) to induce fertility  
380 resulting in the release of large numbers of gametes ( $>10^5$ ). Gametes were allowed to settle on  
381 coverslips and their development was monitored under an inverted microscope (Olympus BX50).

### 382 **Evaluation of parthenogenetic capacity and sex**

383 The sex of the gametophytes was assessed using SDR-specific PCR markers [25], and  
384 parthenogenetic capacity was evaluated by scoring the capacity of released gametes to develop  
385 into adult filaments of more than 10 cells after 16 days in the absence of fusion with gametes of  
386 the opposite sex (single sex gamete cultures).

### 387 **Cross design, culturing and phenotyping**

388 A cross between a parthenogenetic female (strain EA1) and a non-parthenogenetic male (strain  
389 RB1) was carried out using a standard genetic cross protocols [62] and a diploid heterozygous  
390 sporophyte was isolated (Ec236) (Figure 1; Table S1). At maturity, the sporophyte (strain Ec236)  
391 produced unilocular sporangia, i.e, reproductive structures where meiosis takes place (Figure 1). A  
392 total of 272 unilocular sporangia were isolated, and one gametophyte was isolated from each  
393 unilocular sporangium.

394 The 272 strains of the EA1 x RB1 derived segregating population were cultivated in autoclaved  
395 sea water supplemented with half strength Provasoli solution [63] at 13°C, with a light dark cycle  
396 of 12:12 (20  $\mu\text{mol photon m}^{-2} \text{s}^{-1}$ ) using daylight-type fluorescent tubes [61]. All manipulations were  
397 performed in a laminar flow hood under sterile conditions. We phenotyped the strains for  
398 parthenogenetic capacity (P+ or P-) and for sex (male or female). Parthenogenetic capacity was  
399 assessed by scoring the capacity of the gametes to develop into partheno-sporophytes in the  
400 absence of fertilization. In order to assess phenotype stability, gametophytes were sub-cultivated  
401 in different conditions for two weeks and then exposed to high intensity light to induce fertility.  
402 Parthenogenetic capacity was measured using the released gametes (Table S3). We monitored  
403 gamete germination every two days. In P+ strains, >96% of the gametes developed as partheno-  
404 sporophytes in the absence of fertilization whereas in P- strains, less than 4% of the gametes were  
405 capable of parthenogenesis. To test the stability of the phenotype across generations, we cultivated  
406 partheno-sporophytes and induced them to produce unilocular sporangia and release meio-spores  
407 to obtain a new generation of gametophytes. The parthenogenetic capacity of gametes derived  
408 from these second-generation gametophytes was then tested (Table S3). Note that this experiment  
409 is feasible in P- males because a very small proportion (less than 4%) of their gametes are  
410 nevertheless able to develop into mature partheno-sporophytes.

411 Each of the 272 gametophytes of the EA1 x RB1 segregating family was frozen in liquid nitrogen  
412 in a well of a 96 well plate. After lyophilization, tissues were disrupted by grinding. DNA of each  
413 gametophyte was extracted using the NucleoSpin® 96 Plant II kit (Macherey-Nagel) according to  
414 the manufacturer's instructions and stored at -80°C. Sexing of gametophytes was carried out using  
415 two molecular sex markers for each sex (FeScaf06\_ex03 forward: CGTGGTGGACTCATTGACTG;

416 FeScaf06\_ex03 reverse: AGCAGGAACATGTCCCAAAC; 68\_56\_ex02 forward:  
417 GGAACACCCTGCTGGAAC; 68\_56\_ex02 reverse: CGCTTTGCGCTGCTCTAT) [33]. PCR was performed  
418 with the following reaction temperatures: 94°C 2min; 30 cycles of 94°C 40s, 60°C 40s and 72°C 40s;  
419 72°C 5min, and with the following PCR mixture 2 µL DNA, 100 nM of each primers, 200 µM of dNTP  
420 mix, 1X of Go Taq® green buffer, 2 mM of MgCl<sub>2</sub>, 0.2 µL of powdered milk at 10% and 0.5 U of Taq  
421 polymerase (Promega).

## 422 DNA extraction and library RAD sequencing

423 A double digest RAD sequencing (ddRAD-seq) library was generated using 152 individuals from  
424 the EA1 x RB1 segregating population. Parthenogenetic individuals were selected (37 females and  
425 36 males) as well as non-parthenogenetic males (79 individuals). DNA extraction was performed  
426 for each individual (Macherey-Nagel, NucleoSpin® Plant II kit (GmbH & Co.KG, Germany) and DNA  
427 quantity was measured and standardized at 100 ng using a PicoGreen® (Fischer Scientific) method  
428 for quantification. The DNA quality was checked on agarose gels.

429 The ddRAD-seq library was constructed as in [64] using *HhaI* and *SphI* restriction enzymes (New  
430 England Biolabs, <https://www.neb.com/>). Those enzymes were selected based on an *in silico*  
431 digestion simulation of the Ec32 reference genome [18] using the R package SimRAD [65]. After  
432 digestion, samples were individually barcoded using unique adapters by ligation with T4 DNA ligase  
433 (New England Biolabs, <https://www.neb.com/>). Then, samples were cleaned with AMPure XP beads  
434 (Beckman Coulter Genomics), and PCR was performed with the Q5® hot Start High-Fidelity DNA  
435 polymerase kit (New England Biolabs, <https://www.neb.com/>) to increase the amount of DNA  
436 available for each individual and to add Illumina flowcell annealing sequences, multiplexing indices  
437 and sequencing primer annealing regions. After pooling the barcoded and indexed samples, PCR  
438 products of between 550 and 800 bp were selected using a Pippin-Prep kit (Sage Science, Beverly,  
439 MA, USA), and the library was quantified using both an Agilent® 2100 Bioanalyzer (Agilent  
440 Technologies) and qPCR. The library was sequenced on two Illumina HiSeq 2500 lanes (Rapid Run  
441 Mode) by UMR 8199 LIGAN-PM Genomics platform (Lille, France), with paired-end 250 bp reads.

## 442 Quality filtering and reference mapping

443 The ddRAD-seq sequencing data was analysed with the Stacks pipeline (version 1.44) [26]. The  
444 raw sequence reads were filtered by removing reads lacking barcodes and restriction enzyme sites.  
445 Sequence quality was checked using a sliding window of 25% of the length of a read and reads with  
446 <90% base call accuracy were discarded. Using the program PEAR (version 0.9.10, [66]) paired-end  
447 sequencing of short fragments generating overlapping reads were identified and treated to build

448 single consensus sequences. These single consensus sequences were added to the singleton rem1  
449 and rem2 sequences produced by Stacks forming a unique group of singleton sequences. For this  
450 study, paired-end reads and singleton sequences were then trimmed to 100 bp with the program  
451 TRIMMOMATIC [67]. The genome of the male parent of the population (strain RB1) was recently  
452 sequenced to generate an assembly [32] guided by the *Ectocarpus* species 7 reference genome  
453 published in 2010 [68]. We performed a *de novo* analysis running the `denovo_map.pl` program of  
454 Stacks. Firstly, this program assembles loci in each individual *de novo* and calls SNPs in each  
455 assembled locus. In a second step, the program builds a catalog with the parental loci and in a third  
456 step, loci from each individual are matched against the catalogue to determine the allelic state at  
457 each locus in each individual. We then used BWA (Li, H. Aligning sequence reads, clone sequences  
458 and assembly contigs with BWA-MEM.arXiv:1303.3997) to align the consensus sequence of the  
459 catalog loci to the reference genome and used the Python script “`integrate_alignments.py`” of the  
460 Stacks pipeline to integrate alignment information back into the original *de novo* map output files  
461 [69]. In a final step, SNPs were re-called for all individuals at every locus and exported as a vcf file.

#### 462 **Genetic map construction and QTL mapping**

463 The vcf file obtained with the Stacks pipeline was first filtered to keep only loci with maximum  
464 of 10% of missing samples and samples with a maximum of 30% of missing data. The program Lep-  
465 MAP3 (LP3) [70] was used to construct the genetic map. LP3 is suitable to analyse low-coverage  
466 datasets and its algorithm reduces data filtering and curation on the data, yielding more markers in  
467 the final maps with less manual work. In order to obtain the expected AxB segregation type for this  
468 haploid population, the pedigree file was constructed by setting the parents as haploid grand-  
469 parents and two dummy individuals were introduced for parents. The module `ParentCall2` of LP3  
470 took as input the pedigree and the vcf files to call parental genotypes. The module  
471 `SeparateChromosomes2` used the genotype call file to assign markers into linkage groups (LGs).  
472 Several LOD score limits were tested to obtain an optimal LOD score of 8 giving a stable number of  
473 LGs. The module `JoinSingles2All` was then run to assign singular markers to existing LGs by  
474 computing LOD scores between each single marker and markers from the existing LGs. The module  
475 `OrderMarkers2` then ordered the markers within each LG by maximizing the likelihood of the data  
476 given the order. Sex averaged map distances were computed and 10 runs were performed to select  
477 the best order for each LG, based on the best likelihood. This module was run with the parameters  
478 `grandparentPhase=1` and `outputPhasedData=1` in order to obtain phased data for QTL mapping.  
479 This phased data was converted to fully informative genotypic data using the script  
480 `map2gotypes.awk` distributed with the LP3 program.

481 Identification and mapping of QTL were carried out using the R package R/qtl (version 1.39-5)  
482 [71] and MapQTL version 5. Because parthenogenetic capacity was phenotyped as a binary trait  
483 (either non-parthenogenetic 0 or parthenogenetic 1) non-parametrical statistics were used to  
484 identify loci involved in parthenogenesis. In R/qtl, the scanone function was used with the “binary”  
485 model to perform a non-parametrical interval mapping with the binary or Haley-Knott regression  
486 methods. In MapQTL, the Kruskal-Wallis non-parametric method was used. To determine the  
487 statistical significance of the major QTL signal, the LOD significant threshold was determined by  
488 permutation.

#### 489 **Analysis of linkage disequilibrium**

490 In order to determine an approximate interval around the QTL peaks for the candidate genes  
491 search, linkage disequilibrium was calculated using vcftools [72] and the vcf file obtained from the  
492 Stacks pipeline with a minor allele frequency of 0.05.

#### 493 **Transcriptome data**

494 The small number of gametes released from *Ectocarpus siliculosus* strains did not allow RNA-seq  
495 data to be obtained from this species. To analyse gene expression in P- (male) and P+ (female)  
496 gametes, we therefore used two *Ectocarpus* species 1 strains belonging to the same *Ectocarpus*  
497 *siliculosi* group [31], a P- male (NZKU1\_3) and a P+ female (NZKU32-22-21), which produce  
498 sufficient numbers of gametes for RNA extraction.

499 Gametes of male and female *Ectocarpus* species 1 were concentrated after brief centrifugation,  
500 flash frozen and stored at -80°C until RNA extraction. RNA was extracted from duplicate samples  
501 using the Qiagen RNeasy plant mini kit ([www.qiagen.com](http://www.qiagen.com)) with an on-column DNase I treatment.  
502 Between 69 and 80 million sequence reads were generated for each sample using Illumina HiSeq  
503 2000 paired-end technology with a read length of 125 bp (Fasteris, Switzerland) (Table S10). Read  
504 quality was assessed with FastQC (<http://www.bioinformatics.babraham.ac.uk/projects/fastqc>),  
505 and low quality bases and adapter sequences were trimmed using Trimmomatic (leading and  
506 trailing bases with quality below 3 and the first 12 bases were removed, minimum read length 50bp)  
507 [67]. High score reads were used for transcriptome assembly generated with the Trinity *de novo*  
508 assembler (ref) with default parameters and normalized mode. RNA-seq reads were mapped to the  
509 assembled reference transcriptome using the Bowtie2 aligner [73] and the counts of mapped reads  
510 were obtained with HTSeq [74]. Expression values were represented as TPM and TPM<1 was  
511 applied as a filter to remove noise if both replicates of both samples exhibit it. Differential  
512 expression was analysed using the DESeq2 package (Bioconductor; [75]) using an adjusted p-value  
513 cut-off of 0.05 and a minimal fold-change of two. The reference transcripts were blasted to the



514 reference genome Ec32 predicted proteins  
515 (<http://bioinformatics.psb.ugent.be/orcae/overview/EctsiV2>) (e-value cut-off = 10e-5) and the  
516 orthology relationship between *Ectocarpus* species 1 and Ec32 (*Ectocarpus* species 7) was  
517 established based on the best reciprocal blast hits.

#### 518 Identification of candidate genes in the QTL intervals

519 We used two methods to identify putative candidate genes located in the QTL intervals. First, a  
520 marker-by-marker method, by mapping the sequences of the markers located within each QTL  
521 interval to the reference genome of the closely reference species strain Ec32 (Cock et al., 2010).  
522 When a sequence successfully mapped to the Ec32 genome, a coordinate was recorded for the  
523 marker, relative to its position on the physical map of Ec32. The linkage disequilibrium (see method  
524 above) estimated for each linkage group was used to refine the number of genes non-randomly  
525 associated with these markers, giving a first list of candidate genes within each QTL region. The  
526 second method used the same approach but was based on the reference genome of the paternal  
527 strain of the population (strain RB1). There were some differences between the two lists obtained  
528 by the two methods, which are due to the following factors: (a) because the assembly of the RB1  
529 genome was guided by the Ec32 reference genome and its annotation was based on Ec32  
530 transcriptomic data, the RB1 genome potentially lacks some genes that would be due to loci such  
531 as genes that are unique to the species *E. siliculosus* (RB1 strain) being omitted during the guided  
532 assembly. Hence the list obtained with the first method (using the Ec32 genome) contains genes  
533 that are absent from the RB1 genome; (b) while the two species are closely related, they are not  
534 identical, and the *E. siliculosus* genetic map exhibited some rearrangements compared to Ec32  
535 which placed some markers, along with associated genes, into the QTL intervals (these missing  
536 markers were located elsewhere on the Ec32 genome). In summary, the list obtained with Ec32  
537 genome contained some genes that are missing from the RB1 genome because of its imperfect  
538 guided assembly and the list obtained with the RB1 genome contained some genes absent from  
539 the corresponding intervals on Ec32 because of rearrangements. A final, conservative list of  
540 candidate genes was obtained by merging the two lists in order not to omit any gene that were  
541 potentially located within the intervals (Table S11).

#### 542 SNP and indel detection method

543 Draft genomes sequences are available for the parent strains RB1 and EA1 [32]. Using Bowtie2,  
544 we aligned the EA1 genome against the RB1 genome and generated an index with sorted positions.  
545 The program samtools mpileup [76] was used to extract the QTL intervals and call variants between  
546 the two genomes. The positions of variants between the two genomes were identified and filtered

547 based on mapping and sequence quality using bcftools [72]. The annotation file generated for the  
548 RB1 genome was then used to select SNPs and indels located in exons of protein-coding genes for  
549 further study (bcftool closest command). The effect of polymorphism on modification of protein  
550 products was assessed manually using GenomeView [77], the RB1 genome annotation file (gff3)  
551 and the vcf file for each QTL region.

#### 552 **GO term enrichment analysis**

553 A Gene Ontology enrichment analysis was performed using two lists of genes: a predefined list  
554 that corresponded to genes from all three QTL intervals and a reference list including all putative  
555 genes in the mapped scaffolds based on the Ec32 reference genome and that had a GO term  
556 annotation. The analysis was carried out with the package TopGO for R software (Adrian Alexa, Jörg  
557 Rahnenführer, 2016, version 2.24.0) by comparing the two lists using a Fisher's exact test based on  
558 gene counts.

#### 559 **Epistasis analysis**

560 Epistasis analysis was carried out with the R package R/qtl (version 3.3.1). Two analyses were  
561 performed, one with the full data set (female and male genotypes generated with RAD-seq method)  
562 and the second with only the male individuals. For both analyses, the scantwo function from R/qtl  
563 were used with the model "binary" as the phenotypes of the individuals is either 1 (P+) or 0 (P-).

#### 564 **Fitness measurements**

565 Reproductive success was assessed in the segregating population by measuring the capacity of  
566 male P+ and P- gametes to fuse with female gametes and by measuring the length of the  
567 germinating sporophytes derived from these crosses. For this, we crossed males and females as  
568 described in [62]. Briefly, we mixed the same amount of male and female gametes (app.  $1 \times 10^3$   
569 gametes) in a suspending drop, and the proportion of gametes that succeeded in fusing was  
570 measured as in [78]. Two different P+ males (Ec236-34 and Ec236-245) and two different P- males  
571 (Ec236-10 and Ec236-298) were crossed with five different females (Ec236-39; -203; -233; -284 and  
572 Ec560) (Table S13). Between 50 and 150 cells (zygotes or unfertilised gametes) were counted for  
573 each cross. The length of zygotes derived from a cross between the female strain Ec236-105 and  
574 either the male P- strain Ec236-191 or the male P+ strain Ec236-154 was measured after 5h, 24h,  
575 48h, 3 days and 4 days of development using Image J 1.46r [79] (13 zygotes for the P- male parent  
576 and 14 zygotes for P+ male parent). For all datasets, the assumption of normality (Shapiro test) and  
577 the homoscedasticity (Bartlett's test) were checked. The latter's assumptions were not met for

578 zygote length, and consequently statistical significance differences at each time of development  
579 was tested with a non-parametrical test (Mann Whitney U-test,  $\alpha=5\%$ ).

### 580 **Measurement of gamete size**

581 Gamete size was measured for representative strains of each parthenogenetic phenotype found  
582 in the segregating population (P+ and P-) (Table S3). Synchronous release of gametes was induced  
583 by transferring each gametophyte to a humid chamber in the dark for approximately 14 hours at  
584 13°C followed by the addition of fresh PES-supplemented NSW medium under strong light  
585 irradiation. Gametes were concentrated by phototaxis using unidirectional light, and collected in  
586 Eppendorf tubes. Gamete size was measured by impedance-based flow cytometry (Cell Lab  
587 QuantaTM SC MPL, Beckman Coulter®). A Kruskal-Wallis test ( $\alpha=5\%$ ) followed by a posthoc Dunn's  
588 test for pairwise comparisons were performed using R software to compare female and male  
589 gamete size (Table S14).

### 590 **Acknowledgements**

591 This work was supported by the CNRS, Sorbonne Université and the ERC (grant agreement  
592 638240). We thank Denis Roze for fruitful discussion and comments on the manuscript.

### 593 **Author contributions**

594 LM, KA, RL, SMC, AP prepared the biological material and performed experiments. LM, KA, AL  
595 performed the computational analysis. LM, KA, RL, SMC, JMC analysed data. SMC designed and  
596 coordinated the study. SMC wrote the manuscript with valuable input from LM and JMC. All authors  
597 read and approved the final manuscript.

598

### 599 **References**

- 600 1. Neiman M, Sharbel TF, Schwander T. Genetic causes of transitions from sexual  
601 reproduction to asexuality in plants and animals. *J Evol Biol.* 2014;27: 1346–1359.  
602 doi:10.1111/jeb.12357
- 603 2. Jackson JBC, Buss LW, Cook RE, Ashmun JW. Population biology and evolution of clonal  
604 organisms. 1985; Available: [http://agris.fao.org/agris-](http://agris.fao.org/agris-search/search.do?recordID=US882407388)  
605 [search/search.do?recordID=US882407388](http://agris.fao.org/agris-search/search.do?recordID=US882407388)
- 606 3. Hughes RN. *Functional Biology of Clonal Animals.* Springer Science & Business Media;  
607 1989.
- 608 4. Asker S, Jerling L. *Apomixis in Plants.* CRC Press; 1992.

- 609 5. Savidan YH. Asexual reproduction: Genetics and evolutionary aspects - ProQuest  
610 [Internet]. 2000 [cited 19 Jan 2017]. Available:  
611 [http://search.proquest.com/openview/fcb1eee81966389648d649757636828e/1?pq-](http://search.proquest.com/openview/fcb1eee81966389648d649757636828e/1?pq-origsite=gscholar&cbl=54068)  
612 [origsite=gscholar&cbl=54068](http://search.proquest.com/openview/fcb1eee81966389648d649757636828e/1?pq-origsite=gscholar&cbl=54068)
- 613 6. Otto SP, Lenormand T. Resolving the paradox of sex and recombination. *Nat Rev Genet.*  
614 2002;3: 252–261. doi:10.1038/nrg761
- 615 7. Bell G. The Masterpiece of Nature : The Evolution and Genetics of Sexuality. CUP Archive;  
616 1982.
- 617 8. Koltunow AM, Grossniklaus U. Apomixis: a developmental perspective. *Annu Rev Plant*  
618 *Biol.* 2003;54: 547–574. doi:10.1146/annurev.arplant.54.110901.160842
- 619 9. Spillane C, Curtis MD, Grossniklaus U. Apomixis technology development-virgin births in  
620 farmers' fields? *Nat Biotechnol.* 2004;22: 687–691. doi:10.1038/nbt976
- 621 10. Barcaccia G, Albertini E. Apomixis in plant reproduction: a novel perspective on an old  
622 dilemma. *Plant Reprod.* 2013;26: 159–179. doi:10.1007/s00497-013-0222-y
- 623 11. Grossniklaus U, Nogler GA, van Dijk PJ. How to Avoid Sex. *Plant Cell.* 2001;13: 1491.  
624 doi:10.1105/tpc.13.7.1491
- 625 12. Van Dijk PJ, Tas IC, Falque M, Bakx-Schotman T. Crosses between sexual and apomictic  
626 dandelions (*Taraxacum*). II. The breakdown of apomixis. *Heredity.* 1999;83 ( Pt 6): 715–  
627 721.
- 628 13. Matzk F, Meister A, Schubert I. An efficient screen for reproductive pathways using mature  
629 seeds of monocots and dicots. *Plant J Cell Mol Biol.* 2000;21: 97–108.
- 630 14. Noyes RD, Rieseberg LH. Two independent loci control agamospermy (Apomixis) in the  
631 triploid flowering plant *Erigeron annuus*. *Genetics.* 2000;155: 379–390.
- 632 15. Catanach AS, Erasmuson SK, Podivinsky E, Jordan BR, Bicknell R. Deletion mapping of  
633 genetic regions associated with apomixis in *Hieracium*. *Proc Natl Acad Sci U S A.* 2006;103:  
634 18650–18655. doi:10.1073/pnas.0605588103
- 635 16. Ogawa D, Johnson SD, Henderson ST, Koltunow AMG. Genetic separation of autonomous  
636 endosperm formation (AutE) from the two other components of apomixis in *Hieracium*.  
637 *Plant Reprod.* 2013;26: 113–123. doi:10.1007/s00497-013-0214-y
- 638 17. Conner JA, Mookkan M, Huo H, Chae K, Ozias-Akins P. A parthenogenesis gene of apomict  
639 origin elicits embryo formation from unfertilized eggs in a sexual plant. *Proc Natl Acad Sci.*  
640 2015;112: 11205–11210. doi:10.1073/pnas.1505856112
- 641 18. Cock JM, Sterck L, Rouzé P, Scornet D, Allen AE, Amoutzias G, et al. The *Ectocarpus*  
642 genome and the independent evolution of multicellularity in brown algae. *Nature.*  
643 2010;465: 617–621. doi:10.1038/nature09016

- 644 19. Bothwell JH, Marie D, Peters AF, Cock JM, Coelho SM. Cell cycles and endocycles in the  
645 model brown seaweed, *Ectocarpus siliculosus*. *Plant Signal Behav.* 2010;5: 1473–1475.
- 646 20. Soriano M, Li H, Boutilier K. Microspore embryogenesis: establishment of embryo identity  
647 and pattern in culture. *Plant Reprod.* 2013;26: 181–196. doi:10.1007/s00497-013-0226-7
- 648 21. Bothwell JH, Marie D, Peters AF, Cock JM, Coelho SM. Role of endoreduplication and  
649 apomeiosis during parthenogenetic reproduction in the model brown alga *Ectocarpus*.  
650 *New Phytol.* 2010;188: 111–121. doi:10.1111/j.1469-8137.2010.03357.x
- 651 22. Oppliger LV, von Dassow P, Bouchemousse S, Robuchon M, Valero M, Correa JA, et al.  
652 Alteration of Sexual Reproduction and Genetic Diversity in the Kelp Species *Laminaria*  
653 *digitata* at the Southern Limit of Its Range. Sotka E, editor. *PLoS ONE.* 2014;9: e102518.  
654 doi:10.1371/journal.pone.0102518
- 655 23. Han JW, Klochkova TA, Shim J, Nagasato C, Motomura T, Kim GH. Identification of three  
656 proteins involved in fertilization and parthenogenetic development of a brown alga,  
657 *Scytosiphon lomentaria*. *Planta.* 2014;240: 1253–1267. doi:10.1007/s00425-014-2148-5
- 658 24. Luthringer R, Cormier A, Peters AF, Cock JM, Coelho SM. Sexual dimorphism in the brown  
659 algae. *Perspectives in Phycology.* 2015;1: 11–25.
- 660 25. Lipinska AP, Ahmed S, Peters AF, Faugeron S, Cock JM, Coelho SM. Development of PCR-  
661 Based Markers to Determine the Sex of Kelps. Wicker-Thomas C, editor. *PLoS ONE.*  
662 2015;10: e0140535. doi:10.1371/journal.pone.0140535
- 663 26. Catchen J, Hohenlohe PA, Bassham S, Amores A, Cresko WA. Stacks: an analysis tool set  
664 for population genomics. *Mol Ecol.* 2013;22: 3124–3140. doi:10.1111/mec.12354
- 665 27. Cormier A, Avia K, Sterck L, Derrien T, Wucher V, Andres G, et al. Re-annotation, improved  
666 large-scale assembly and establishment of a catalogue of noncoding loci for the genome  
667 of the model brown alga *Ectocarpus*. *New Phytol.* 2017;214: 219–232.  
668 doi:10.1111/nph.14321
- 669 28. Montecinos AE, Couceiro L, Peters AF, Desrut A, Valero M, Guillemin M-L. Species  
670 delimitation and phylogeographic analyses in the *Ectocarpus* subgroup *siliculosi*  
671 (*Ectocarpales*, *Phaeophyceae*). *J Phycol.* 2017;53: 17–31. doi:10.1111/jpy.12452
- 672 29. Heesch S, Cho GY, Peters AF, Le Corguillé G, Falentin C, Boutet G, et al. A sequence-tagged  
673 genetic map for the brown alga *Ectocarpus siliculosus* provides large-scale assembly of  
674 the genome sequence. *New Phytol.* 2010;188: 42–51. doi:10.1111/j.1469-  
675 8137.2010.03273.x
- 676 30. Avia K, Coelho SM, Montecinos GJ, Cormier A, Lerck F, Mauger S, et al. High-density  
677 genetic map and identification of QTLs for responses to temperature and salinity stresses  
678 in the model brown alga *Ectocarpus*. *Sci Rep.* 2017;7: 43241. doi:10.1038/srep43241
- 679 31. Montecinos AE, Guillemin M-L, Couceiro L, Peters AF, Stoeckel S, Valero M. Hybridization  
680 between two cryptic filamentous brown seaweeds along the shore: analysing pre- and

- 681 postzygotic barriers in populations of individuals with varying ploidy levels. *Mol Ecol.*  
682 2017;26: 3497–3512. doi:10.1111/mec.14098
- 683 32. Lipinska AP, Toda NRT, Heesch S, Peters AF, Cock JM, Coelho SM. Multiple gene  
684 movements into and out of haploid sex chromosomes. *Genome Biol.* 2017;18: 104.  
685 doi:10.1186/s13059-017-1201-7
- 686 33. Ahmed S, Cock JM, Pessia E, Luthringer R, Cormier A, Robuchon M, et al. A haploid system  
687 of sex determination in the brown alga *Ectocarpus* sp. *Curr Biol CB.* 2014;24: 1945–1957.  
688 doi:10.1016/j.cub.2014.07.042
- 689 34. Bell, Graham. *The Masterpiece of Nature: The Evolution and Genetics of Sexuality.*  
690 University of California Press, Berkeley.; 1982.
- 691 35. Hoekstra RF. The evolution of sexes. *Experientia Suppl.* 1987;55: 59–91.
- 692 36. Charlesworth B. The population genetics of anisogamy. *J Theor Biol.* 1978;73: 347–357.
- 693 37. Hemsley PA, Grierson CS. The ankyrin repeats and DHHC S-acyl transferase domain of  
694 AKR1 act independently to regulate switching from vegetative to mating states in yeast.  
695 *PloS One.* 2011;6: e28799. doi:10.1371/journal.pone.0028799
- 696 38. Kao LR, Peterson J, Ji R, Bender L, Bender A. Interactions between the ankyrin repeat-  
697 containing protein Akr1p and the pheromone response pathway in *Saccharomyces*  
698 *cerevisiae.* *Mol Cell Biol.* 1996;16: 168–178.
- 699 39. Li J, Pang S, Shan T, Liu F, Gao S. Zoospore-derived monoecious gametophytes in *Undaria*  
700 *pinnatifida* (Phaeophyceae). *Chin J Oceanol Limnol.* 2014;32: 365–371.  
701 doi:10.1007/s00343-014-3139-x
- 702 40. Avise JC. Evolutionary perspectives on clonal reproduction in vertebrate animals. *Proc Natl*  
703 *Acad Sci U S A.* 2015;112: 8867–8873. doi:10.1073/pnas.1501820112
- 704 41. Neaves WB, Baumann P. Unisexual reproduction among vertebrates. *Trends Genet TIG.*  
705 2011;27: 81–88. doi:10.1016/j.tig.2010.12.002
- 706 42. Sinclair EA, Pramuk JB, Bezy RL, Crandall KA, Sites JWJ. DNA evidence for nonhybrid origins  
707 of parthenogenesis in natural populations of vertebrates. *Evol Int J Org Evol.* 2010;64:  
708 1346–1357. doi:10.1111/j.1558-5646.2009.00893.x
- 709 43. Charlesworth B, Jordan CY, Charlesworth D. The evolutionary dynamics of sexually  
710 antagonistic mutations in pseudoautosomal regions of sex chromosomes. *Evol Int J Org*  
711 *Evol.* 2014;68: 1339–1350. doi:10.1111/evo.12364
- 712 44. Mullon C, Pomiankowski A, Reuter M. The effects of selection and genetic drift on the  
713 genomic distribution of sexually antagonistic alleles. *Evol Int J Org Evol.* 2012;66: 3743–  
714 3753. doi:10.1111/j.1558-5646.2012.01728.x

- 715 45. Connallon T, Clark AG. Balancing selection in species with separate sexes: insights from  
716 Fisher's geometric model. *Genetics*. 2014;197: 991–1006.  
717 doi:10.1534/genetics.114.165605
- 718 46. Wittmann MJ, Bergland AO, Feldman MW, Schmidt PS, Petrov DA. Seasonally fluctuating  
719 selection can maintain polymorphism at many loci via segregation lift. *Proc Natl Acad Sci*  
720 *U S A*. 2017;114: E9932–E9941. doi:10.1073/pnas.1702994114
- 721 47. Ewing EP. Genetic Variation in a Heterogeneous Environment VII. Temporal and Spatial  
722 Heterogeneity in Infinite Populations. *Am Nat*. 1979;114: 197–212. doi:10.1086/283468
- 723 48. Chesson PL, Warner RR. Environmental Variability Promotes Coexistence in Lottery  
724 Competitive Systems. *Am Nat*. 1981;117: 923–943. doi:10.1086/283778
- 725 49. Shoemaker WR, Lennon JT. Evolution with a seed bank: The population genetic  
726 consequences of microbial dormancy. *Evol Appl*. 2018;11: 60–75. doi:10.1111/eva.12557
- 727 50. Reinhold K. Maintenance of a genetic polymorphism by fluctuating selection on sex-  
728 limited traits. *J Evol Biol*. 2001;13: 1009–1014. doi:10.1046/j.1420-9101.2000.00229.x
- 729 51. Immler S, Arnqvist G, Otto SP. Ploidally antagonistic selection maintains stable genetic  
730 polymorphism. *Evol Int J Org Evol*. 2012;66: 55–65. doi:10.1111/j.1558-  
731 5646.2011.01399.x
- 732 52. Ewing EP. Selection at the haploid and diploid phases: cyclical variation. *Genetics*.  
733 1977;87: 195–207.
- 734 53. Otto SP, Scott MF, Immler S. Evolution of haploid selection in predominantly diploid  
735 organisms. *Proc Natl Acad Sci U S A*. 2015;112: 15952–15957.  
736 doi:10.1073/pnas.1512004112
- 737 54. Orr HA, Otto SP. Does Diploidy Increase the Rate of Adaptation? *Genetics*. 1994;136:  
738 1475–1480.
- 739 55. Luthringer R, Lipinska AP, Roze D, Cormier A, Macaisne N, Peters AF, et al. The  
740 Pseudoautosomal Regions of the U/V Sex Chromosomes of the Brown Alga *Ectocarpus*  
741 Exhibit Unusual Features. *Mol Biol Evol*. 2015;32: 2973–2985.  
742 doi:10.1093/molbev/msv173
- 743 56. Silberfeld T, Leigh JW, Verbruggen H, Cruaud C, de Reviers B, Rousseau F. A multi-locus  
744 time-calibrated phylogeny of the brown algae (Heterokonta, Ochrophyta, Phaeophyceae):  
745 Investigating the evolutionary nature of the “brown algal crown radiation”. *Mol*  
746 *Phylogenet Evol*. 2010;56: 659–674. doi:10.1016/j.ympev.2010.04.020
- 747 57. Coelho SM, Godfroy O, Arun A, Le Corguillé G, Peters AF, Cock JM. OUROBOROS is a master  
748 regulator of the gametophyte to sporophyte life cycle transition in the brown alga  
749 *Ectocarpus*. *Proc Natl Acad Sci U S A*. 2011;108: 11518–11523.  
750 doi:10.1073/pnas.1102274108

- 751 58. Stalker HD. ON THE EVOLUTION OF PARTHENOGENESIS IN LONCHOPTERA (DIPTERA).  
752 Evolution. 1956;10: 345–359. doi:10.1111/j.1558-5646.1956.tb02862.x
- 753 59. Lampert KP. Facultative parthenogenesis in vertebrates: reproductive error or chance?  
754 Sex Dev Genet Mol Biol Evol Endocrinol Embryol Pathol Sex Determ Differ. 2008;2: 290–  
755 301. doi:10.1159/000195678
- 756 60. Couceiro L, Le Gac M, Hunsperger HM, Mauger S, Destombe C, Cock JM, et al. Evolution  
757 and maintenance of haploid-diploid life cycles in natural populations: The case of the  
758 marine brown alga *Ectocarpus*. *Evol Int J Org Evol*. 2015;69: 1808–1822.  
759 doi:10.1111/evo.12702
- 760 61. Coelho SM, Scornet D, Rousvoal S, Peters NT, Dartevelle L, Peters AF, et al. How to  
761 cultivate *Ectocarpus*. *Cold Spring Harb Protoc*. 2012;2012: 258–261.  
762 doi:10.1101/pdb.prot067934
- 763 62. Coelho SM, Scornet D, Rousvoal S, Peters N, Dartevelle L, Peters AF, et al. Genetic crosses  
764 between *Ectocarpus* strains. *Cold Spring Harb Protoc*. 2012;2012: 262–265.  
765 doi:10.1101/pdb.prot067942
- 766 63. Starr RC, Zeikus JA. Utex—the Culture Collection of Algae at the University of Texas at  
767 Austin 1993 List of Cultures1. *J Phycol*. 1993;29: 1–106. doi:10.1111/j.0022-  
768 3646.1993.00001.x
- 769 64. Brelsford A, Lavanchy G, Sermier R, Rausch A, Perrin N. Identifying homomorphic sex  
770 chromosomes from wild-caught adults with limited genomic resources. *Mol Ecol Resour*.  
771 2017;17: 752–759. doi:10.1111/1755-0998.12624
- 772 65. Lepais O, Weir JT. SimRAD: an R package for simulation-based prediction of the number  
773 of loci expected in RADseq and similar genotyping by sequencing approaches. *Mol Ecol*  
774 *Resour*. 2014;14: 1314–1321. doi:10.1111/1755-0998.12273
- 775 66. Zhang J, Kobert K, Flouri T, Stamatakis A. PEAR: a fast and accurate Illumina Paired-End  
776 reAd mergeR. *Bioinforma Oxf Engl*. 2014;30: 614–620. doi:10.1093/bioinformatics/btt593
- 777 67. Bolger AM, Lohse M, Usadel B. Trimmomatic: a flexible trimmer for Illumina sequence  
778 data. *Bioinforma Oxf Engl*. 2014;30: 2114–2120. doi:10.1093/bioinformatics/btu170
- 779 68. Cock JM, Sterck L, Rouzé P, Scornet D, Allen AE, Amoutzias G, et al. The *Ectocarpus*  
780 genome and the independent evolution of multicellularity in brown algae. *Nature*.  
781 2010;465: 617–621. doi:10.1038/nature09016
- 782 69. Paris JR, Stevens JR, Catchen JM. Lost in parameter space: a road map for stacks. *Methods*  
783 *Ecol Evol*. 2017;8: 1360–1373. doi:10.1111/2041-210X.12775
- 784 70. Rastas P. Lep-MAP3: robust linkage mapping even for low-coverage whole genome  
785 sequencing data. *Bioinforma Oxf Engl*. 2017;33: 3726–3732.  
786 doi:10.1093/bioinformatics/btx494



- 787 71. Broman KW, Wu H, Sen Ś, Churchill GA. R/qtl: QTL mapping in experimental crosses.  
788 Bioinformatics. 2003;19: 889–890. doi:10.1093/bioinformatics/btg112
- 789 72. Danecek P, Auton A, Abecasis G, Albers CA, Banks E, DePristo MA, et al. The variant call  
790 format and VCFtools. Bioinformatics. 2011;27: 2156–2158.  
791 doi:10.1093/bioinformatics/btr330
- 792 73. Langmead B, Salzberg SL. Fast gapped-read alignment with Bowtie 2. Nat Methods.  
793 2012;9: 357–359. doi:10.1038/nmeth.1923
- 794 74. Anders S, Pyl PT, Huber W. HTSeq--a Python framework to work with high-throughput  
795 sequencing data. Bioinforma Oxf Engl. 2015;31: 166–169.  
796 doi:10.1093/bioinformatics/btu638
- 797 75. Love MI, Huber W, Anders S. Moderated estimation of fold change and dispersion for RNA-  
798 seq data with DESeq2. Genome Biol. 2014;15: 550. doi:10.1186/s13059-014-0550-8
- 799 76. Li H, Handsaker B, Wysoker A, Fennell T, Ruan J, Homer N, et al. The Sequence  
800 Alignment/Map format and SAMtools. Bioinforma Oxf Engl. 2009;25: 2078–2079.  
801 doi:10.1093/bioinformatics/btp352
- 802 77. Abeel T, Van Parys T, Saeys Y, Galagan J, Van de Peer Y. GenomeView: a next-generation  
803 genome browser. Nucleic Acids Res. 2012;40: e12–e12. doi:10.1093/nar/gkr995
- 804 78. Lovlie A, Bryhni E. Signal for cell fusion. Nature. 1976;263: 779–781.
- 805 79. Schindelin J, Arganda-Carreras I, Frise E, Kaynig V, Longair M, Pietzsch T, et al. Fiji: an open-  
806 source platform for biological-image analysis. Nat Methods. 2012;9: 676–682.  
807 doi:10.1038/nmeth.2019

808

## 809 Figure Legends

810 **Figure 1. Life cycle of *Ectocarpus siliculosus* and phenotypes of parthenogenetic and non-**  
811 **parthenogenetic strains. A.** Schematic representation of the life cycle of *Ectocarpus siliculosus*. *E.*  
812 *siliculosus* alternates between a gametophyte (haploid) and sporophyte (diploid generation).  
813 Meiosis is carried out in unilocular sporangia on the sporophyte, producing male and female meio-  
814 spores. Meio-spores develop by mitosis into male or female gametophytes, which at maturity  
815 produce male or female gametes. Syngamy reconstitutes the diploid genome. The parthenogenetic  
816 cycle involves parthenogenesis of a gamete when it fails to encounter a gamete of the opposite sex.  
817 The parthenogenetic cycle can be completed either via an apomeiosis to produce meio-spores from  
818 a haploid partheno-sporophyte (as shown) or via endoreduplication during partheno-sporophyte  
819 development, allowing meiosis to occur (not shown). **B.** Photographs of the parthenogenetic  
820 growth of gametes of non-parthenogenetic male (RB1, top) and parthenogenetic female (EA1,

821 bottom) strains of *Ectocarpus siliculosus* after one day, 5 days and 16 days of development. Scale  
822 bar = 25  $\mu$ m. The right panel shows the percentage of 1-5 cell and >10 cell partheno-sporophytes  
823 after 16 days of development for P- male gametes (Ec08, Ec398, Ec400, Ec409, Ec414, n=2632) and  
824 P+ female gametes (Ec399, Ec402, Ec404, Ec406, Ec410, Ec412, Ec415, n=3950).

825 **Figure 2. Quantitative trait loci identified for parthenogenetic capacity in *Ectocarpus siliculosus*.**

826 **A.** The 31 *Ectocarpus siliculosus* linkage groups showing the localization of QTLs for  
827 parthenogenesis. The position of the SDR is represented by a mauve arrow. **B.** QTLs intervals were  
828 detected using the Kruskal Wallis test (blue). **C.** Intra-chromosomal Linkage disequilibrium (LD)-  
829 decay between all pairs of markers for the sex chromosome and LG18. LD between markers ( $r^2$ ) is  
830 a function of marker distances (bp). **D.** Candidate parthenogenesis genes in each QTL interval.  
831 Genes in QTL intervals were selected based on differential expression of their orthologs in P+ versus  
832 P- in gametes, their differential expression between generation (gametophyte/partheno-  
833 sporophyte) and polymorphisms exhibited in exons and predicted to modify the protein product.  
834 \*SDR gametologue; X, sex-specific gene.

835 **Figure 3. Epistatic interactions between parthenogenetic loci.** **A.** Epistatic interactions detected  
836 between the sex-determining region (SDR) and the *P2* QTL. Females can undergo parthenogenesis  
837 independently of the allele carried at the *P2* locus whereas males are only parthenogenetic if they  
838 carried the B allele at the *P2* locus. **B.** Epistatic interaction between the *P3* and *P2* loci. The  
839 combination of the B allele at both *P2* and *P3* loci increases the parthenogenetic frequency.

840 **Figure 4. Fitness of parthenogenetic (P+) and non-parthenogenetic (P-) males.** **A.** Fertilisation  
841 success was assessed by counting the proportion of zygotes obtained after crossing either  
842 parthenogenetic (Ec236-34, Ec236-245) or non-parthenogenetic (Ec236-10, Ec236-298) males with  
843 parthenogenetic females (Ec236-284, Ec236-39, Ec236-203, Ec560) (n=1252). Fusion success  
844 tended to be higher when the male parent was P- (Mann Whitney  $P=0.058$ ; represented by grey  
845 letters). **B.** Growth of zygotes (from 5 hours to 4 days after fertilisation, AF) derived from crosses  
846 performed between female P+ and male P+ or male P- strains (\* $p$ -value<0.01;\*\*\* $p$ -value<0.0001).  
847 Thirteen to fourteen zygotes were scored per cross at each time point. The experiment is  
848 representative of three independent experiments performed with several parental lines (see also  
849 Figure S2). **C.** Representative images of zygotes at different developmental stages, from a male P-  
850 (RB1) x female P+ (Ec236-105) cross and from a male P+ (Ec236-154) x female P+ (Ec236-105) cross.  
851 Scale bar=10  $\mu$ m. **D.** Sizes of gametes from a parthenogenetic female, a parthenogenetic male and  
852 non-parthenogenetic male. The mean diameter of female P+ (Ec236-203, n=1066), a male P+  
853 (Ec236-210, n=9755) and two P- males (Ec236-276, n=45294 and Ec236-10 n=361) lines were

854 measured by cytometry. The values of gamete size shown represent the mean  $\pm$  s.e. for each  
855 individual.

856 **Figure S1. Pedigree of the strains used in this study indicating all the crosses performed.**

857 **Figure S2.** Fitness evaluation of several sporophytes derived from different P- and P+ male lines  
858 crossed with several female lines, at different times after fertilisation (from 5 hours to 4 days after  
859 fertilisation). **A.** Zygotes were derived from crosses performed between female Ec560 P+ and male  
860 Ec236-34 P+ or male Ec236-10 P- strains. **B.** Zygotes derived from the cross between female Ec236-  
861 65 P+ and male Ec236-245 P+ or male Ec236-10 P- strains. Between 4-13 zygotes were scored per  
862 cross in each of the time series. Significant differences (Wilcoxon rank sum test) are indicated (\*p-  
863 value<0.01; \*\*p-value<0.001).

864

#### 865 **Table legends**

866 Table S1. Summary of the strains used for this study. SP: sporophyte; GA: gametophyte.

867 Table S2. Contingency table for parthenogenetic capacity and sex. P+: positive parthenogenetic  
868 capacity; P- negative parthenogenetic capacity.

869 Table S3. Parthenogenetic capacity and sex of the 272 individuals of the segregating population.  
870 Strains used for the RAD-seq, gamete size measurements, fitness measurements are marked with  
871 a cross.

872 Table S4. Summary of the phenotyping and sexing of strains grown under different culture  
873 conditions and after several generations.

874 Table S5. Phenotypes of the progeny derived from two different heterozygous sporophytes  
875 obtained by crossing a male P+ strain and a female P+ strain.

876 Table S6. Statistics for the genetic map.

877 Table S7. QTL analysis results. For each QTL, the name, the linkage disequilibrium (LD) within the  
878 chromosome, the significance obtained with the Kruskal-Wallis test and the percentage of variance  
879 explained (PVE) determined using the Interval Mapping method (IM) is given. The number of genes  
880 found in each QTL interval is also indicated. \*female or male SDR.

881 Table S8. List of the top GO terms identified (TopGO) by GO enrichment analysis for genes  
882 located within the QTL intervals.

883 Table S9. Epistatic interactions detected for parthenogenesis loci using the full dataset (male  
884 and female individuals genotyped with the ddRAD-seq method, first table) and using a subset with

885 only male individuals (second table). The column "interaction" indicates the the chromosomal  
886 locations of the pairs of loci that were found to interact, with "Pos1f" and "Pos2f" referring to the  
887 estimated positions of the QTL in cM. "Lod.full" indicates the improvement in the fit of the full 2-  
888 locus model over the null model. This measurement indicates evidence for at least one QTL,  
889 allowing for interaction. "Lod.fv1" measures the increase when the full model with QTLs on  
890 chromosomes j and k is compared to a single QTL on either chromosome j or k. This measurement  
891 indicates evidence for a second QTL allowing for the possibility of epistasis. "Lod int" measures the  
892 improvement in the fit of the full model over that of the additive model and so indicates evidence  
893 for interaction. "Pos1a" and "pos2a" are the estimated positions (in cM) of the QTL under the  
894 additive model. "Lod.add" measures the improvement comparing with the additive model. This  
895 measurement indicates evidence for at least one QTL assuming no interaction. "Lod.av1" measures  
896 the increase when the additive model with QTLs on chromosomes j and k is compared to the single  
897 QTL model with a single QTL on chromosome j and k. This measurement indicates evidence for a  
898 second QTL assuming no epistasis.

899 Table S10. Summary of the sequencing methods and raw data obtained.

900 Table S11. Predicted functions, expression patterns and polymorphisms of genes in the QTL  
901 intervals. Expression data in transcript per million (TPM) for P- (male) versus P+ (female) gametes  
902 were obtained from strains belonging to the *Ectocarpus siliculosus* group (*Ectocarpus* species 1).  
903 Information about the type of polymorphism in the parental strains of *E. siliculosus* segregating  
904 population (EA1 female and RB1 male) is also included. Genes represented in Figure 2 are  
905 highlighted in bold. "-" means that there is no best reciprocal ortholog with detectable expression  
906 in *Ectocarpus* species 1. Pseudogenes in the sex-determining region were removed except for those  
907 which have a gametologue in the opposite SDR, and these are italicised.

908 Table S12. List of polymorphisms in coding sequence of genes located within the three  
909 parthenogenesis QTL intervals.

910 Table S13. Fusion success of male P- versus P+ gametes with gametes of the opposite sex. The  
911 total number of individuals corresponds to the total number of scored individuals (developing  
912 either by parthenogenesis or derived from fusion of gametes).

913 Table S14. Pairwise comparison statistical tests carried out to determine significantly differences  
914 between P+ female, P+ male and P- male gametes. Two P- male strains (Ec236-10 and Ec236-276),  
915 one P+ female strain (Ec236-203) and one P+ male strain (Ec236-210) were used. The Kruskal-Wallis  
916 test indicated significant difference in gamete size. A posthoc Dunn's test revealed, by pairwise

917 comparison of groups, that sizes gametes of each group (female P+, male P+ and males P-) were  
918 significantly different.

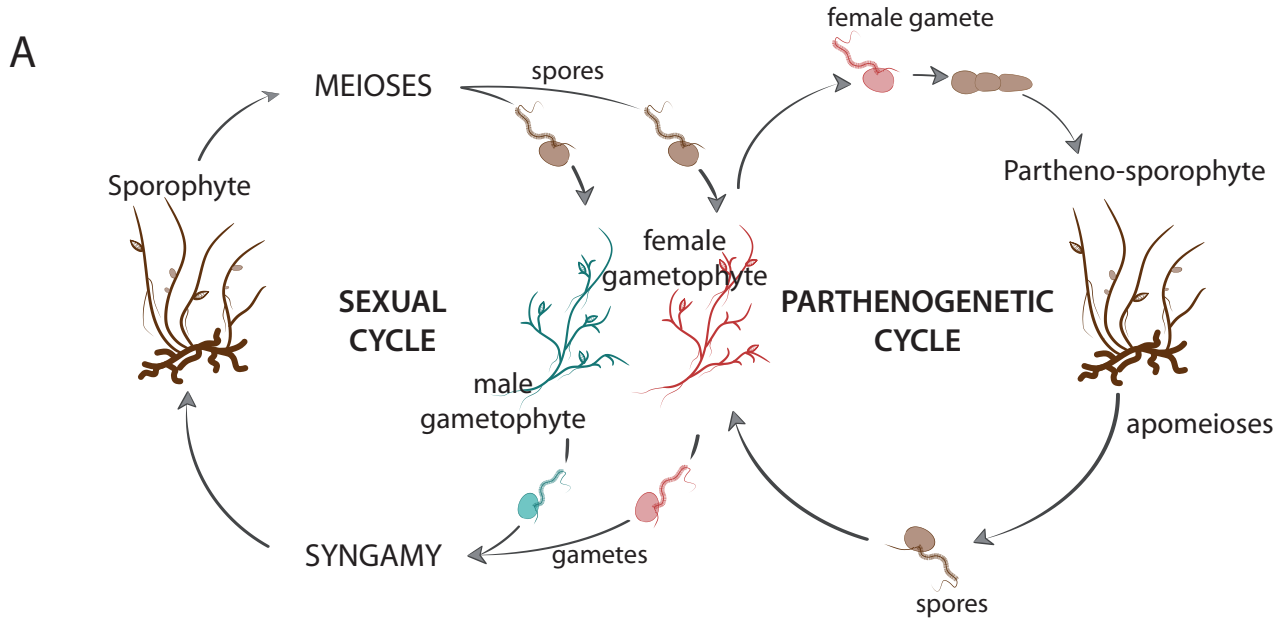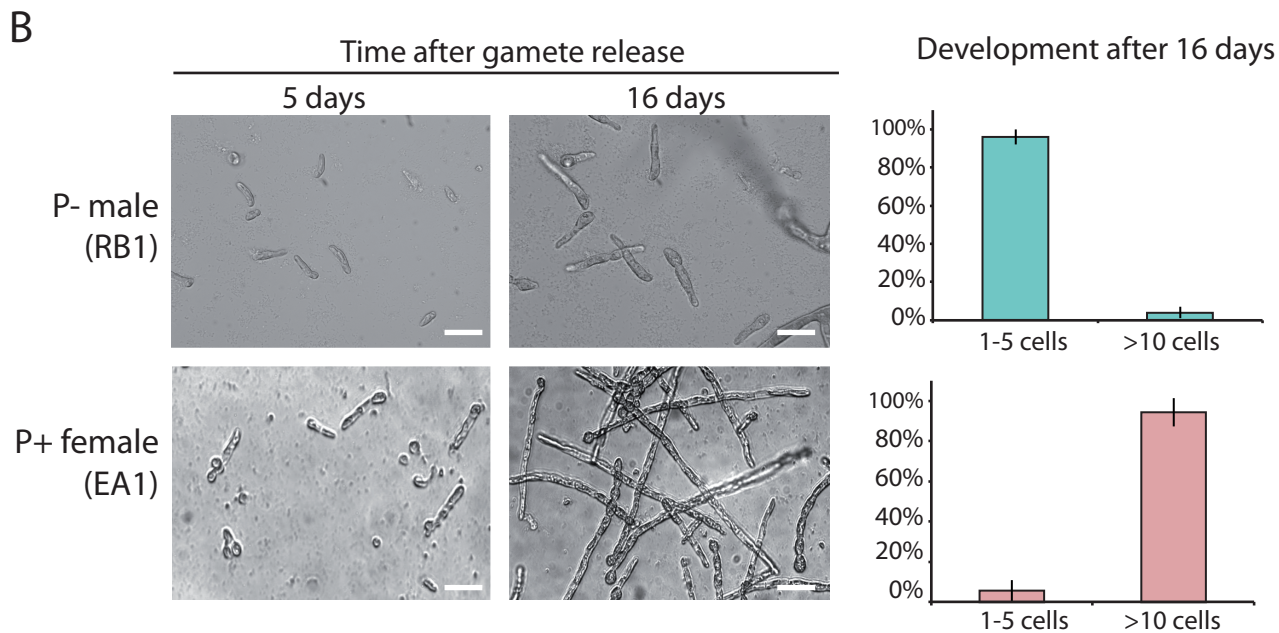

Figure 1

**A**

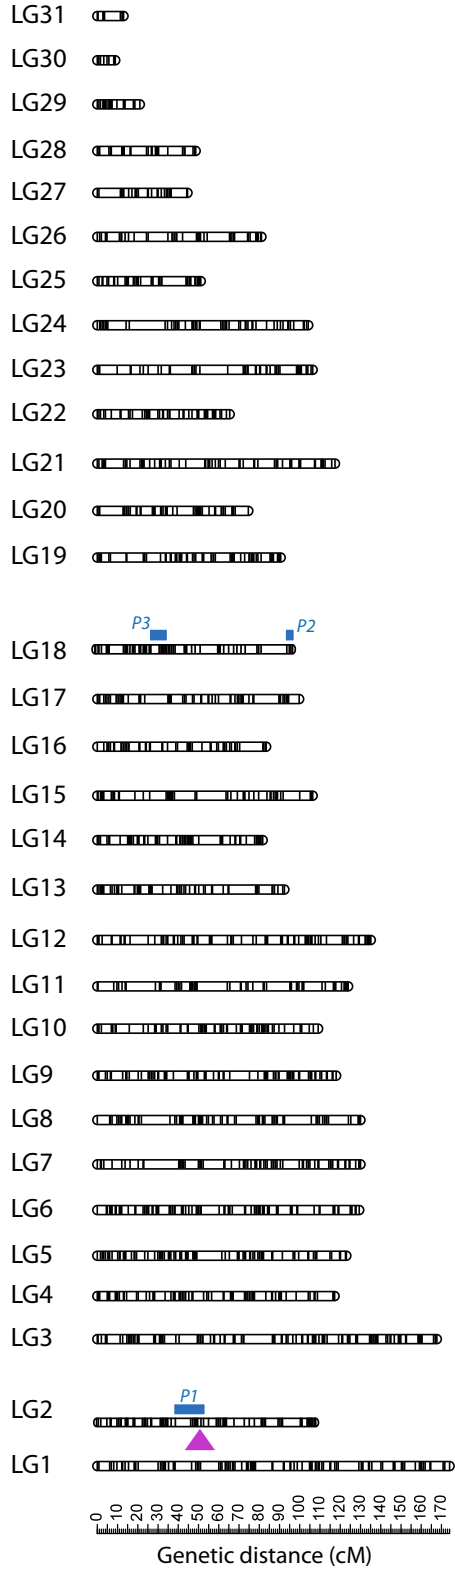

**B**

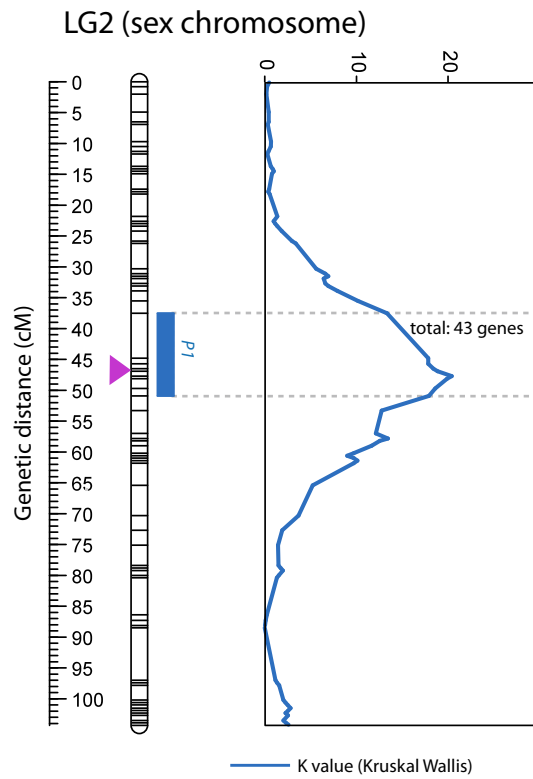

**LG18**

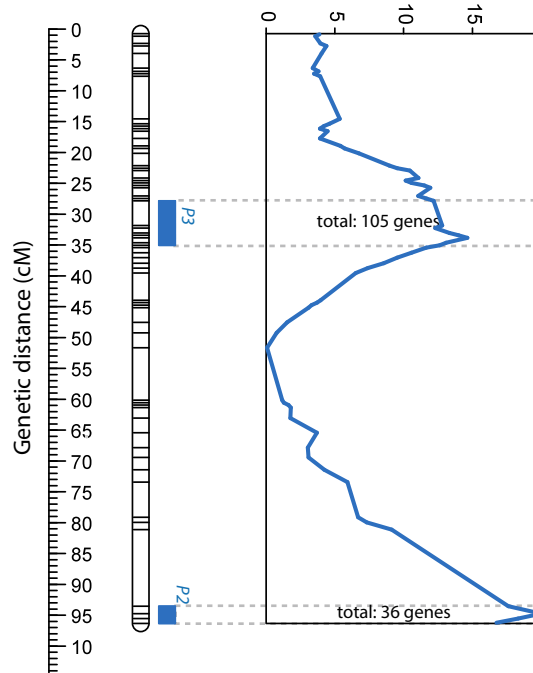

**C**

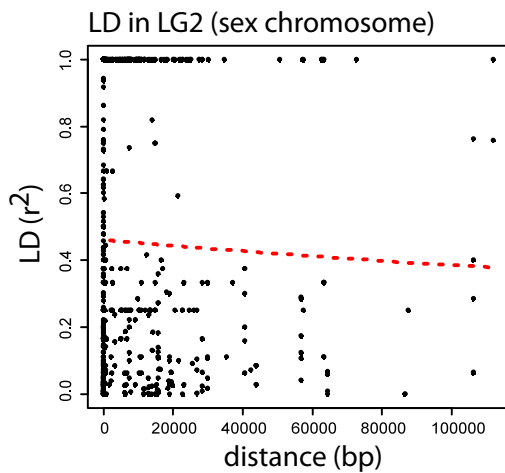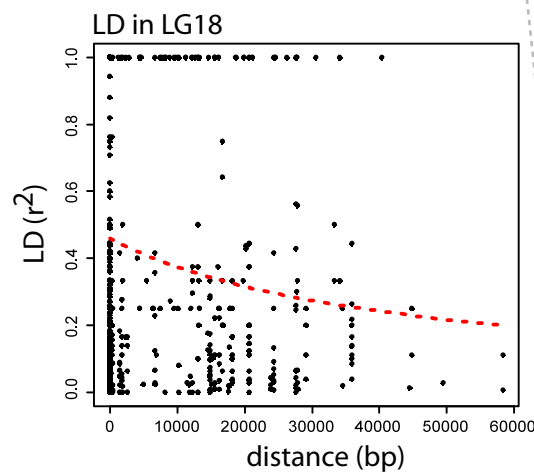

**D**

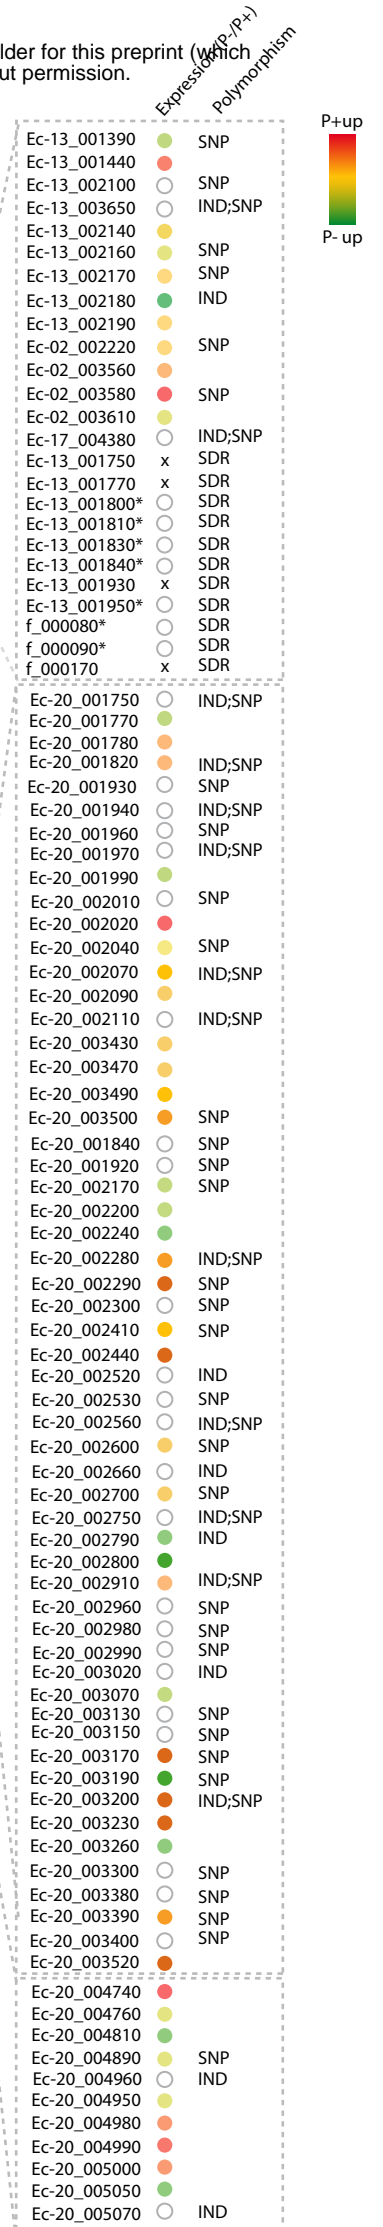

Figure 2

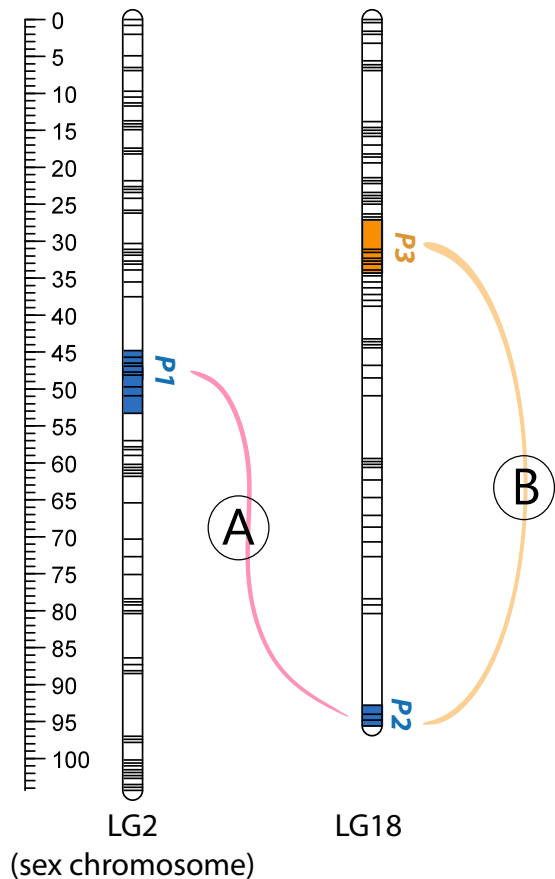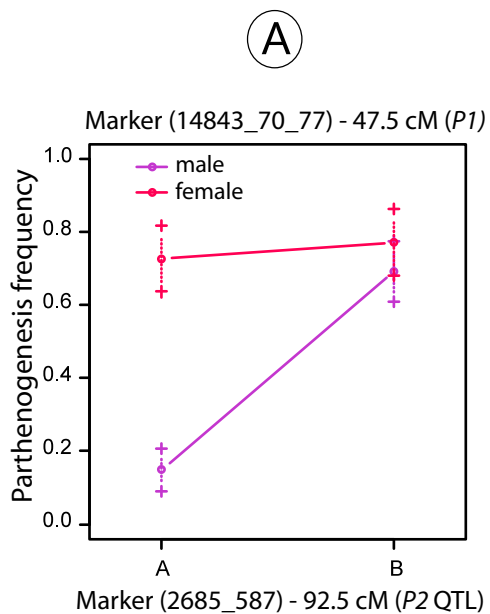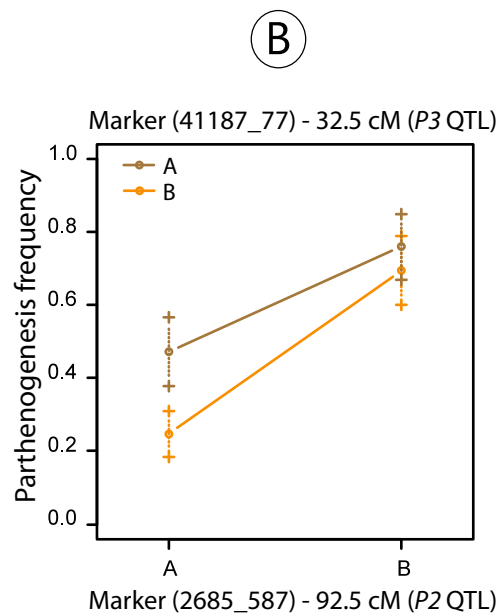

Figure 3



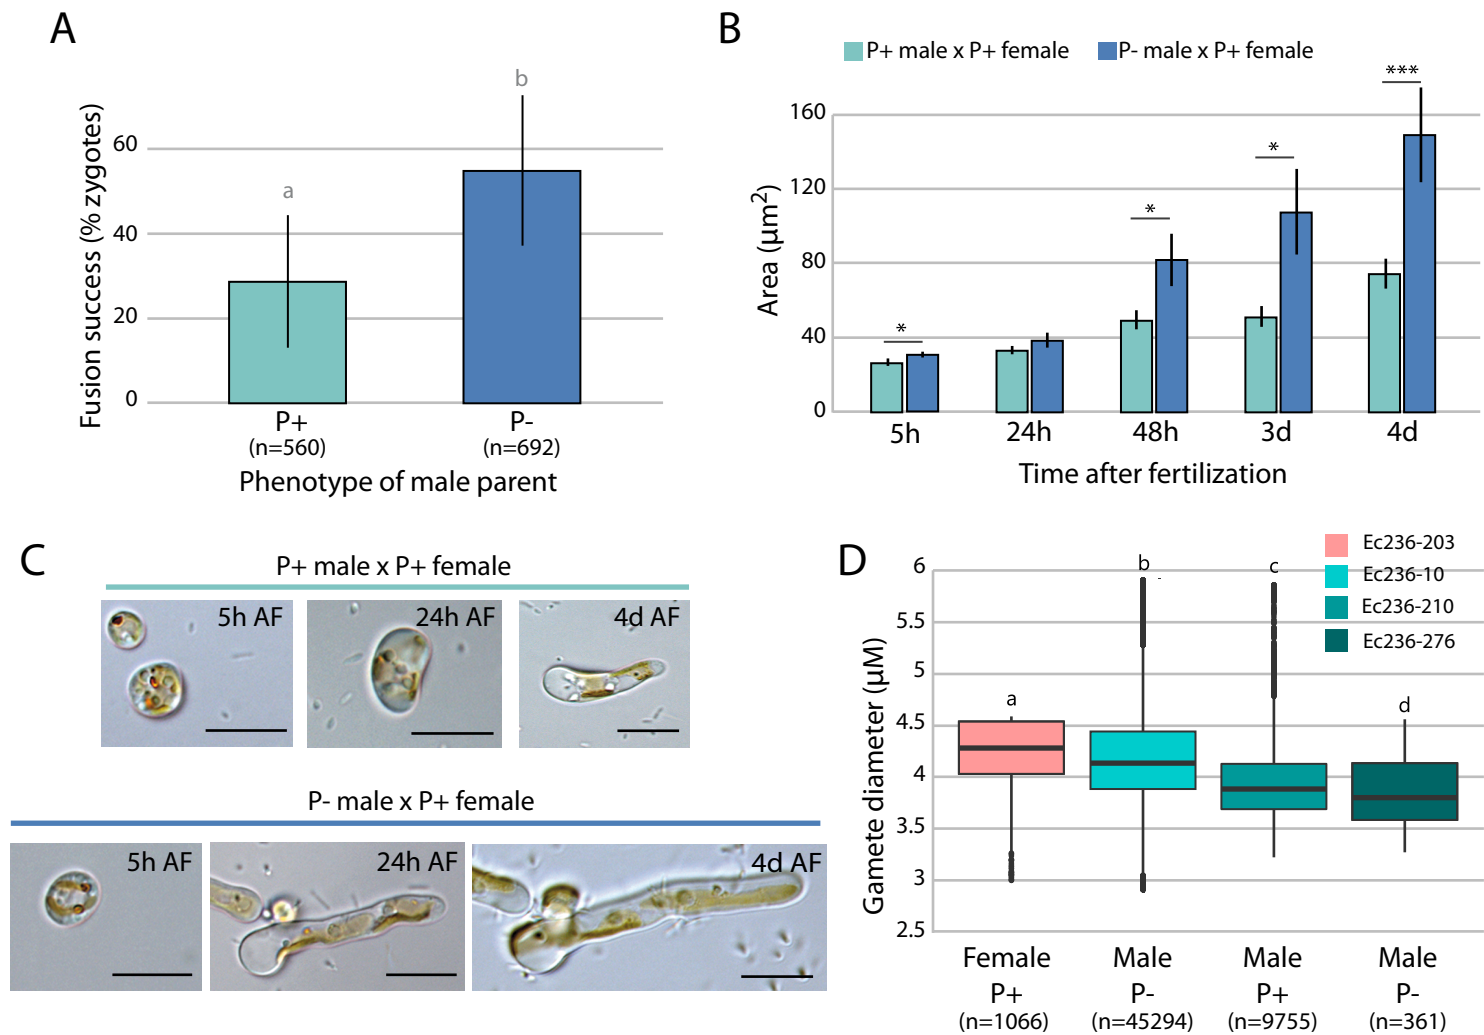

Figure 4

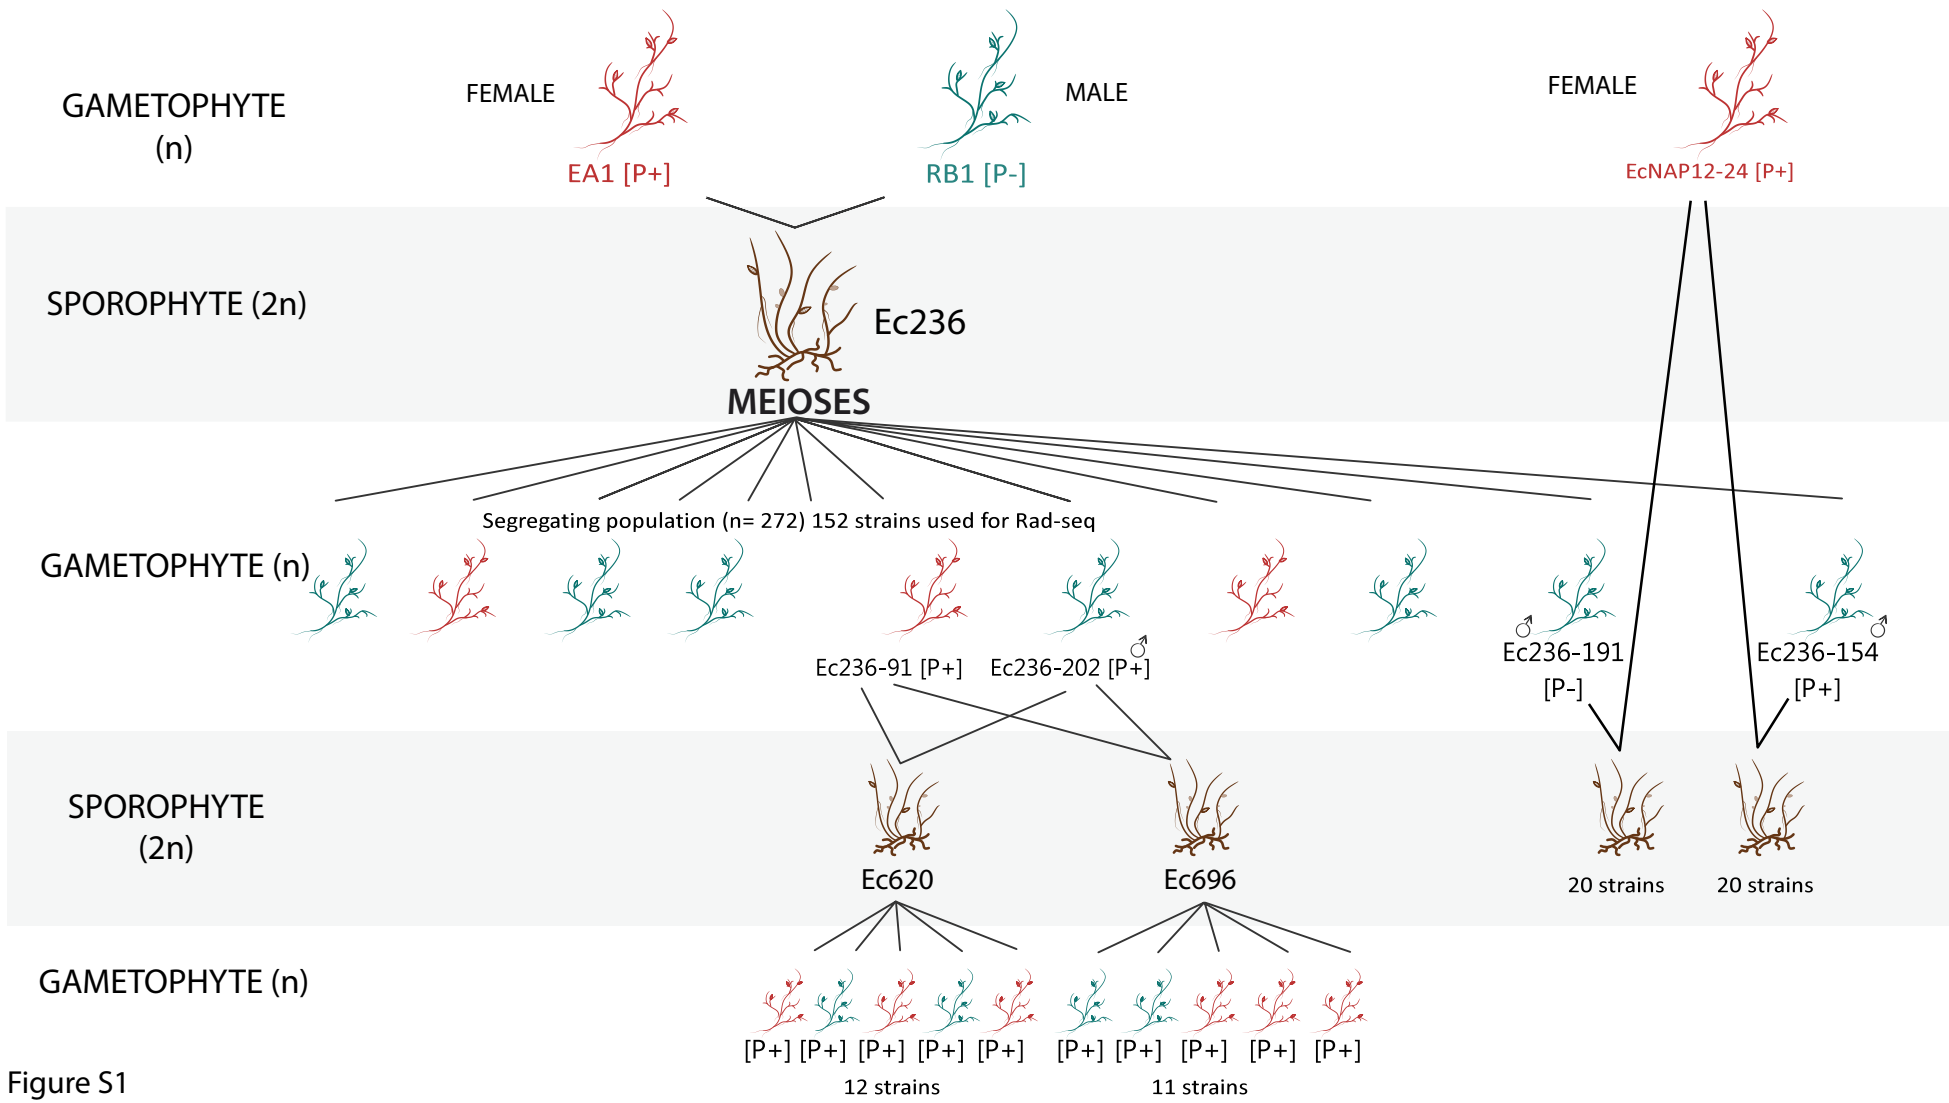

Figure S1

A

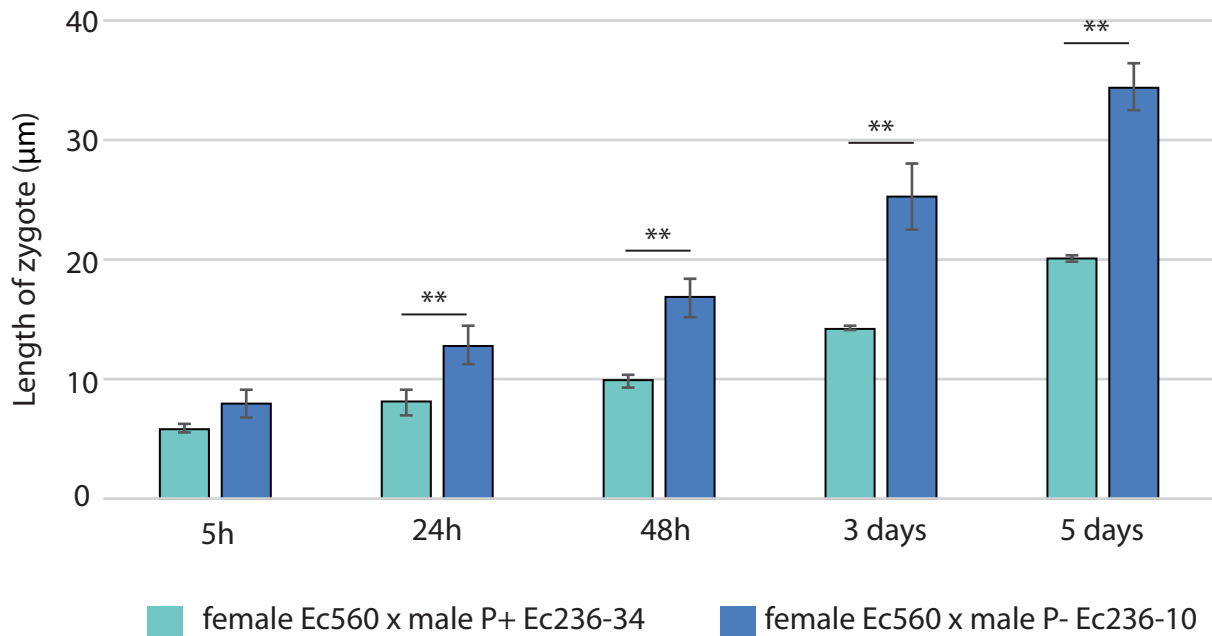

B

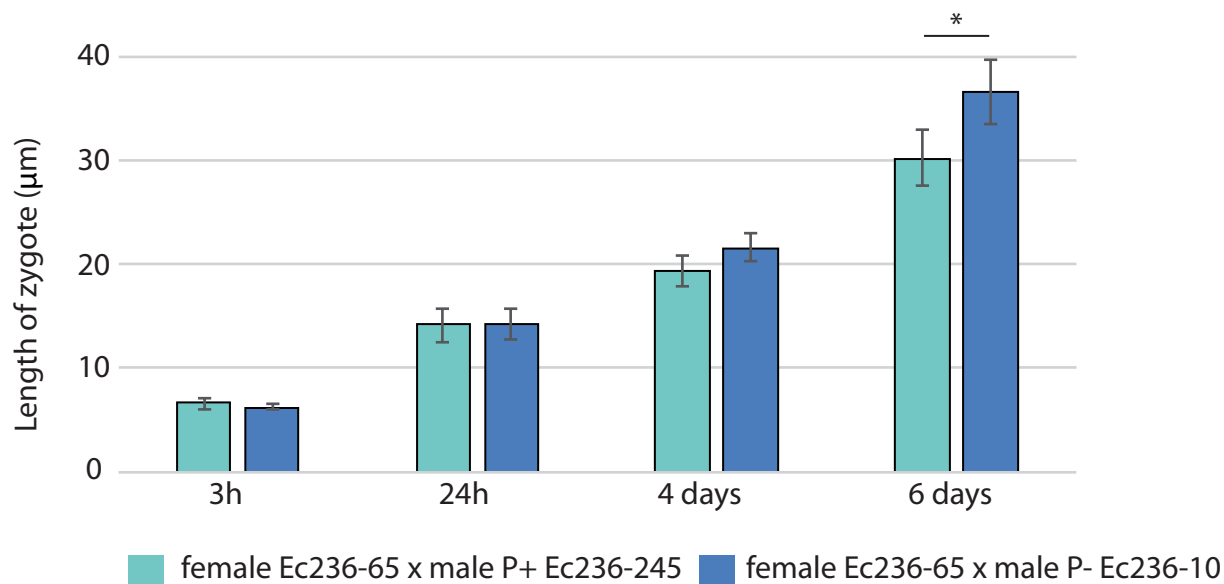

Figure S2
